# Supplementary material for: Dedicated transcriptomics combined with power analysis lead to functional understanding of genes with weak phenotypic changes in knockout lines
Source: PLOS journal article supplement (doi:10.1371/journal.pcbi.1008354), 2020-11-12

## Supplemental Figure S1

Alignments of the ORF regions of *A930004D18Rik* and *A830005F24Rik* among the mouse species and closely related outgroup species where the sequences could be identified in the respective genomic regions. (A) shows the summary of the alignments. (B), (C), and (D) show the alignments of *A930004D18Rik* ORF1, *A930004D18Rik* ORF2, and *A830005F24Rik* ORF separately. For each alignment, all nucleotide sequences have been aligned to the one of *Mus musculus* as reference, and amino acids have been translated according to the reference frame. Alignment was done in Geneious Prime (2019.0.3 Biomatters Ltd.). The topology of the species tree is shown at the left part. Nucleotides and amino acids are shown in IUPAC codes. Enablers (common disablers) are marked with red rectangles.

A

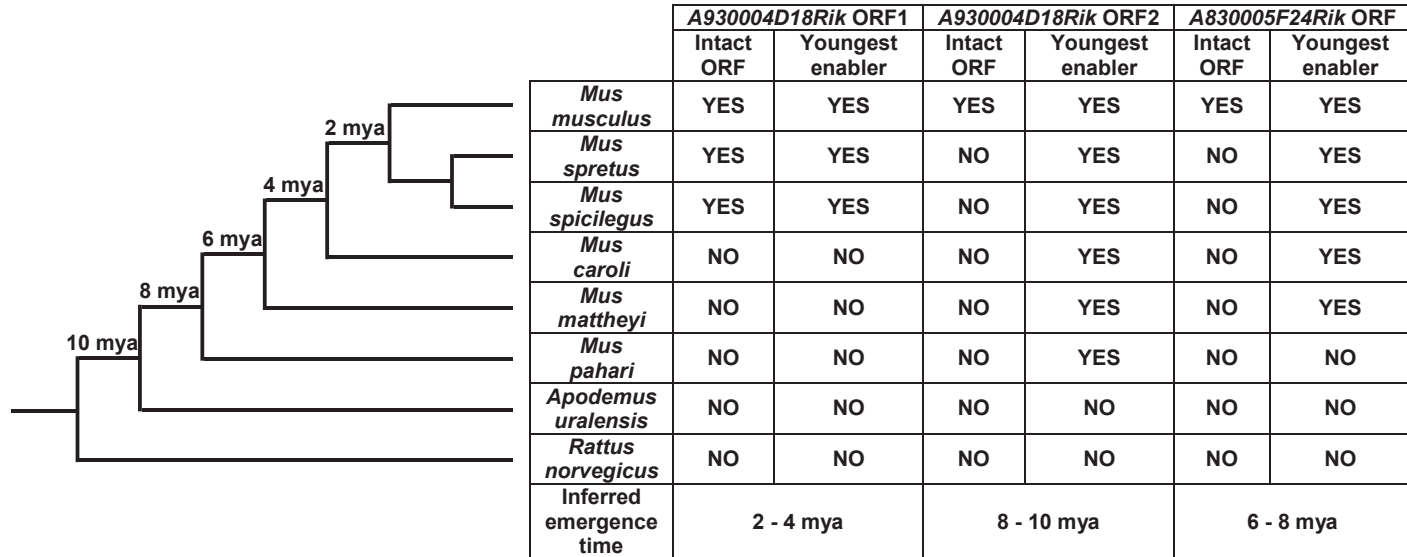

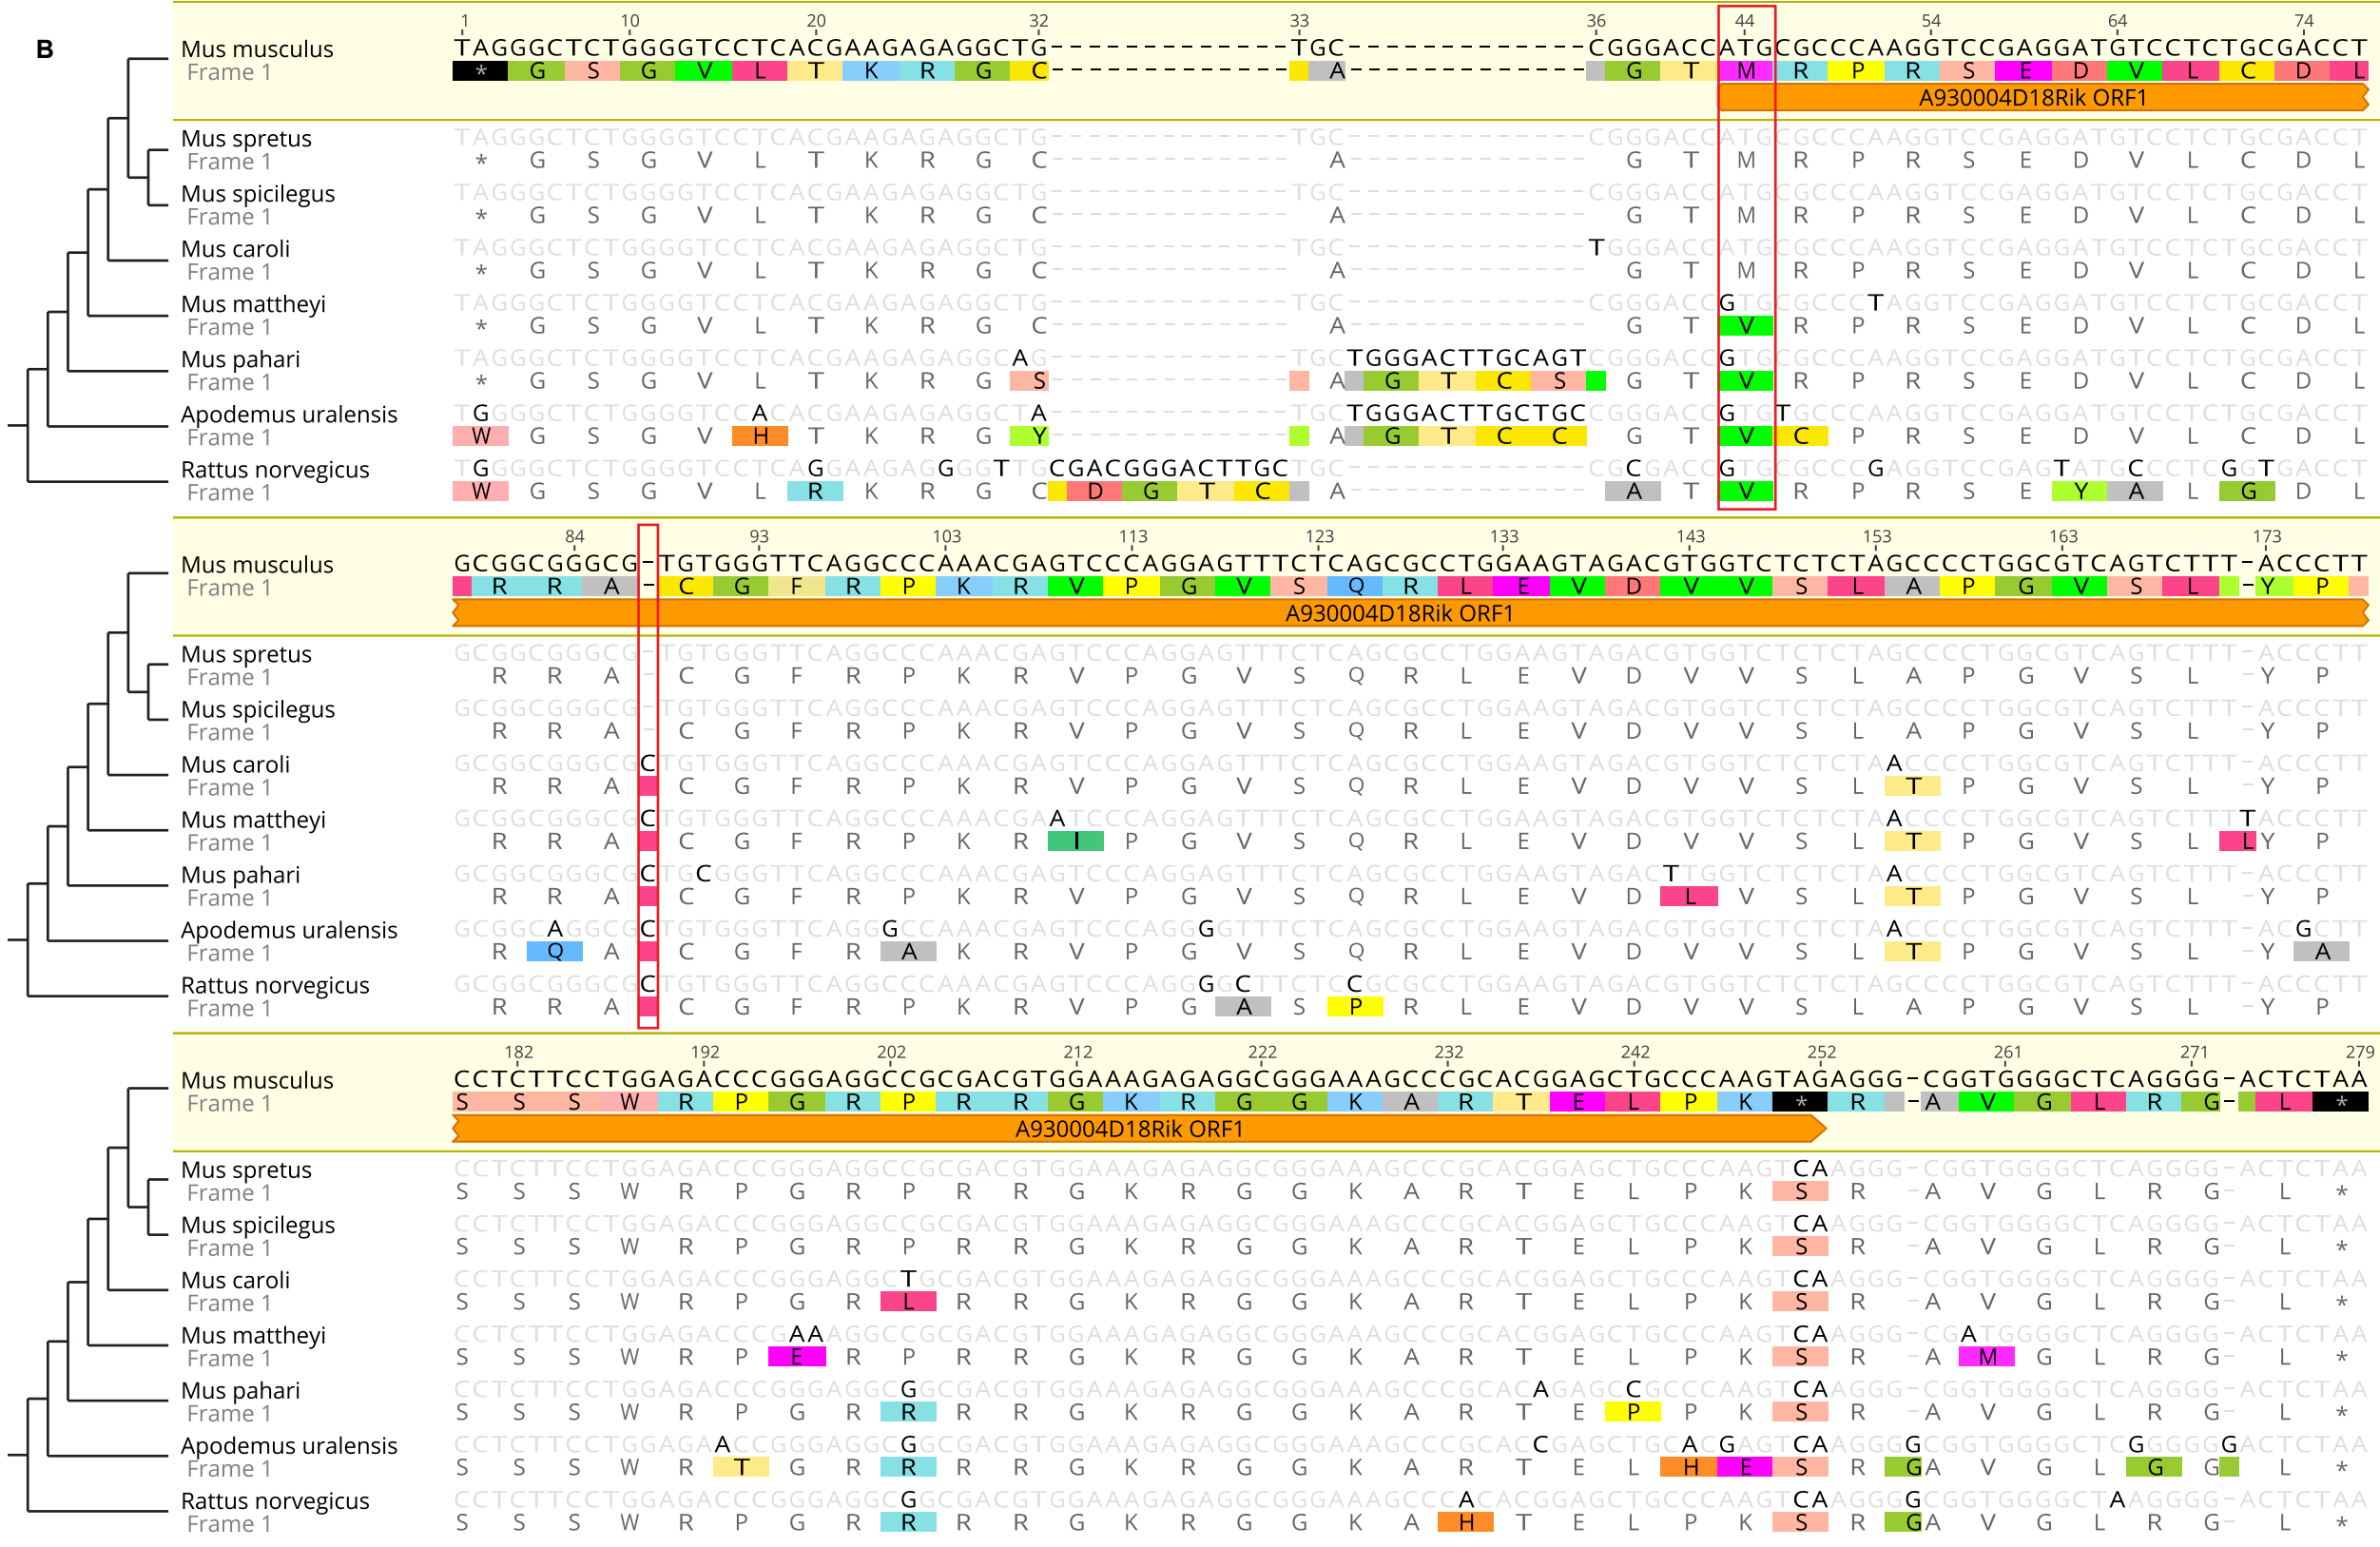

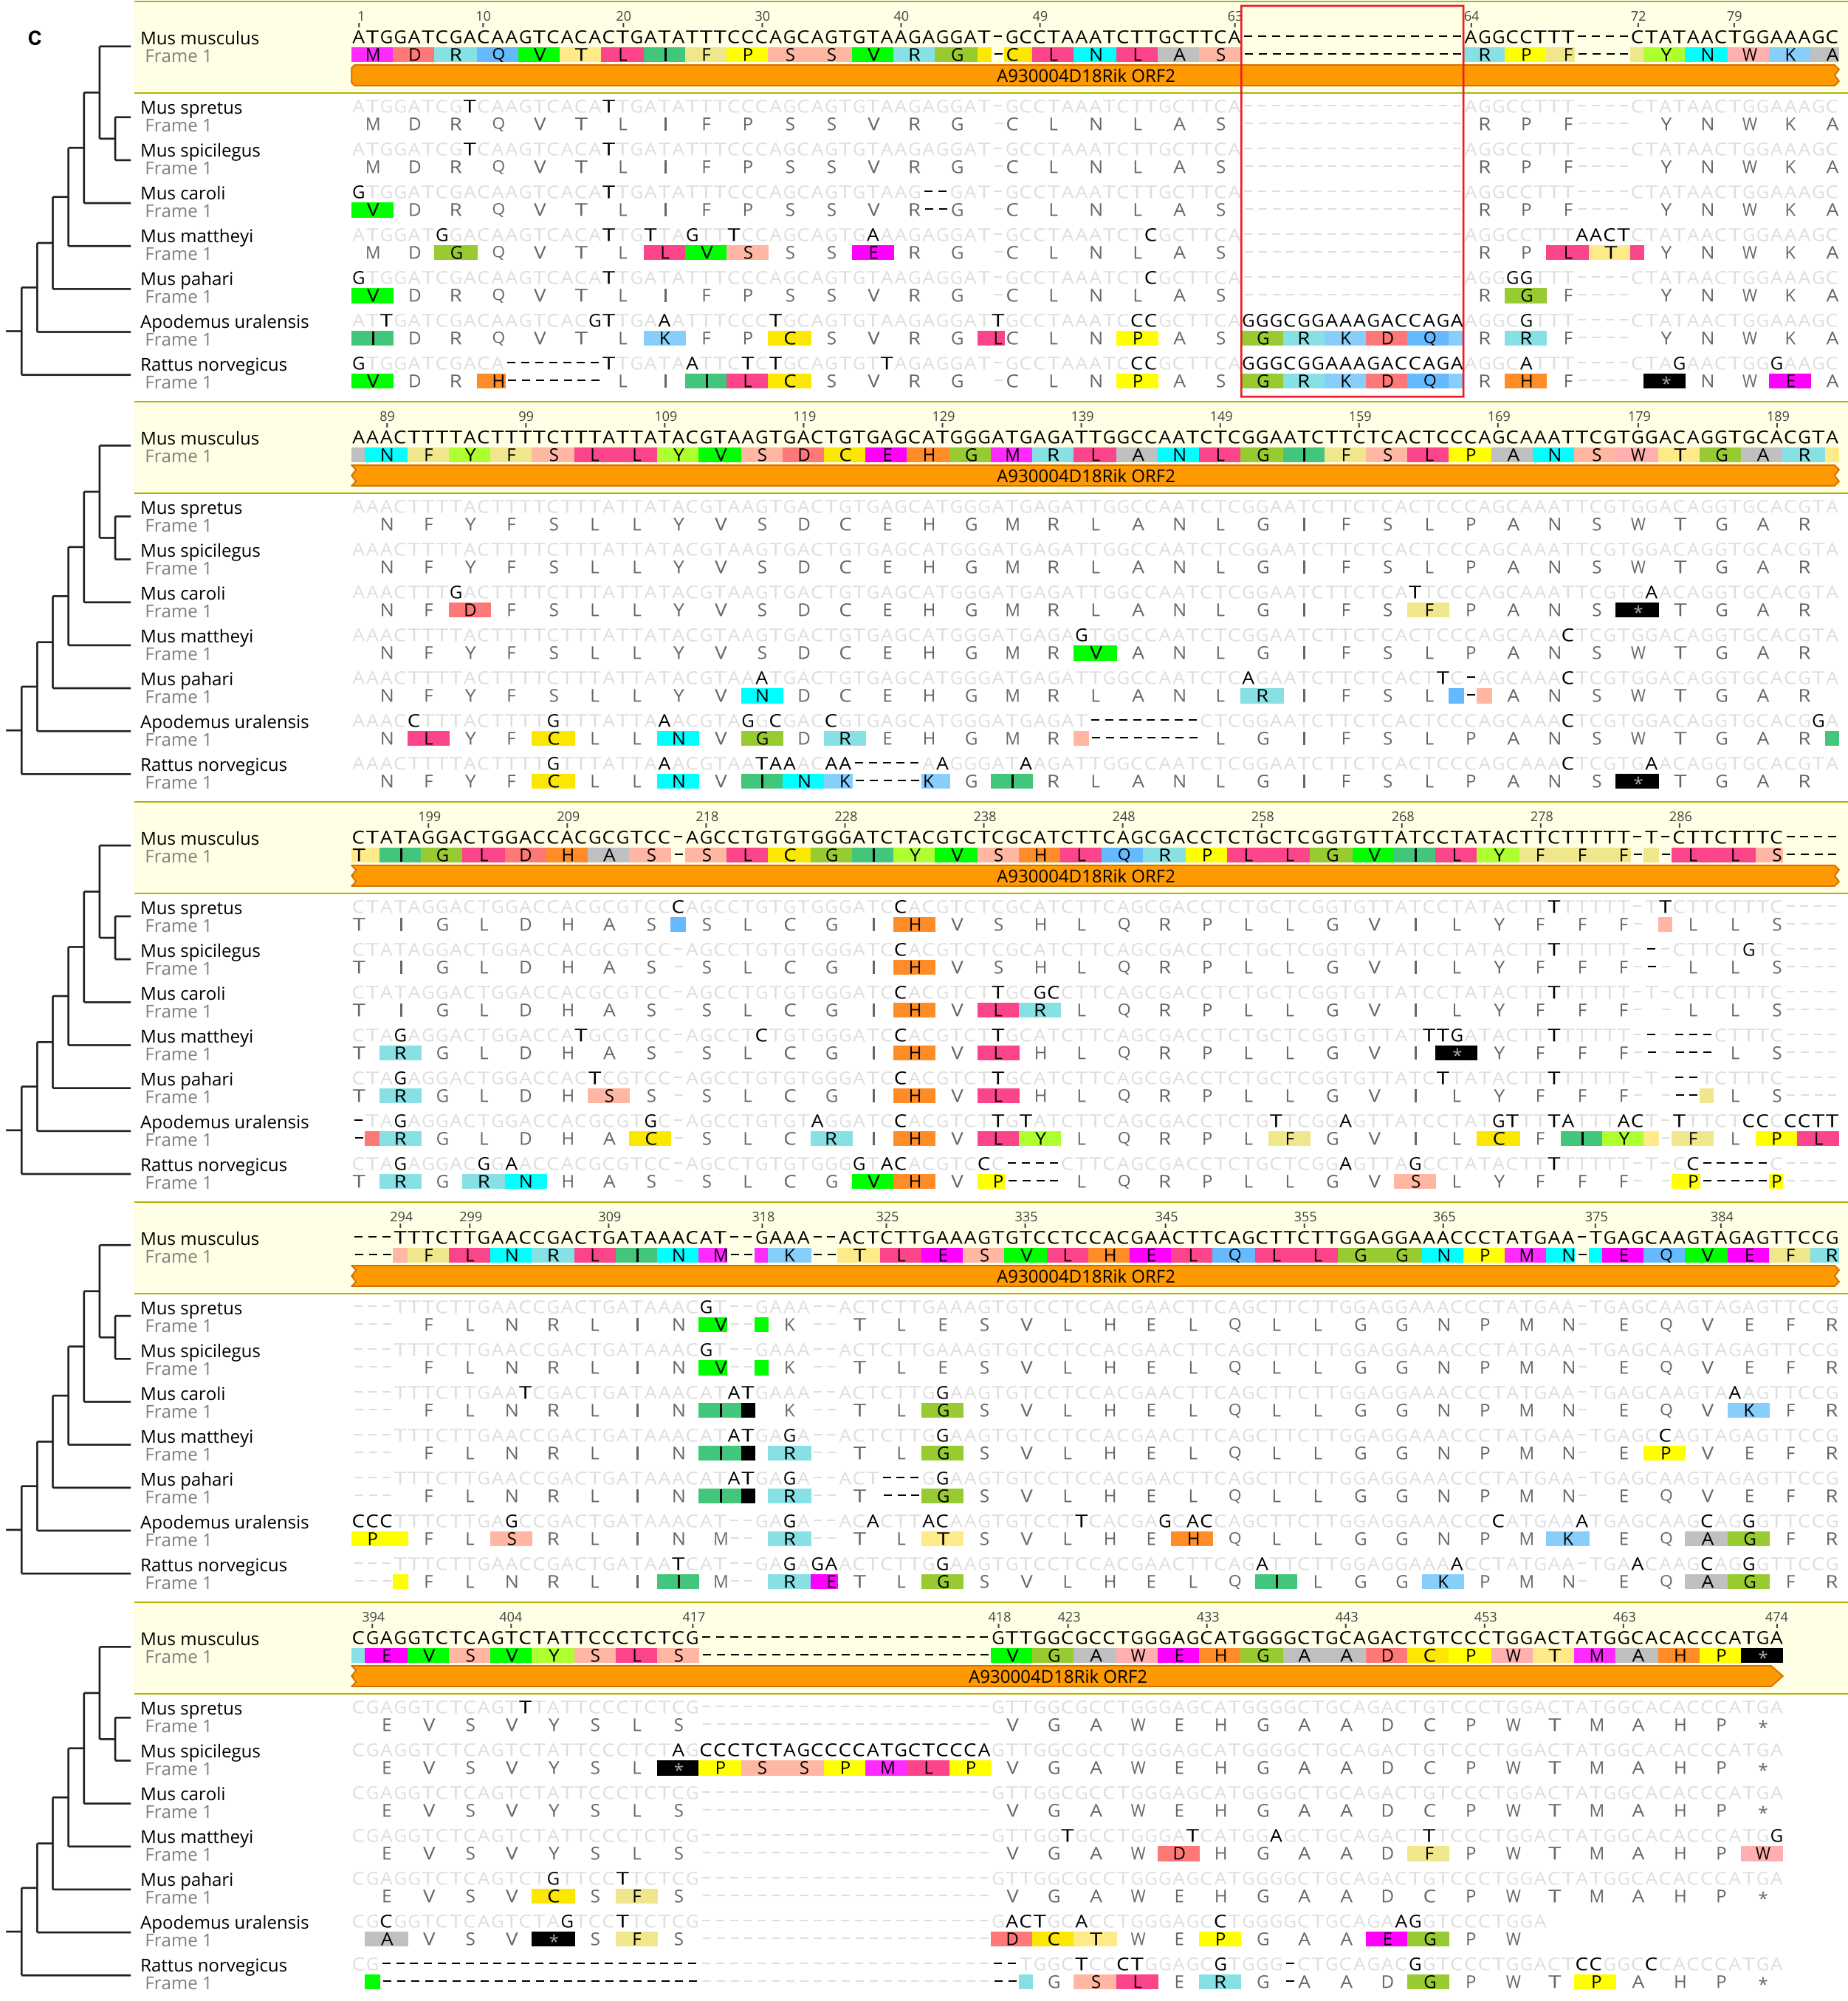

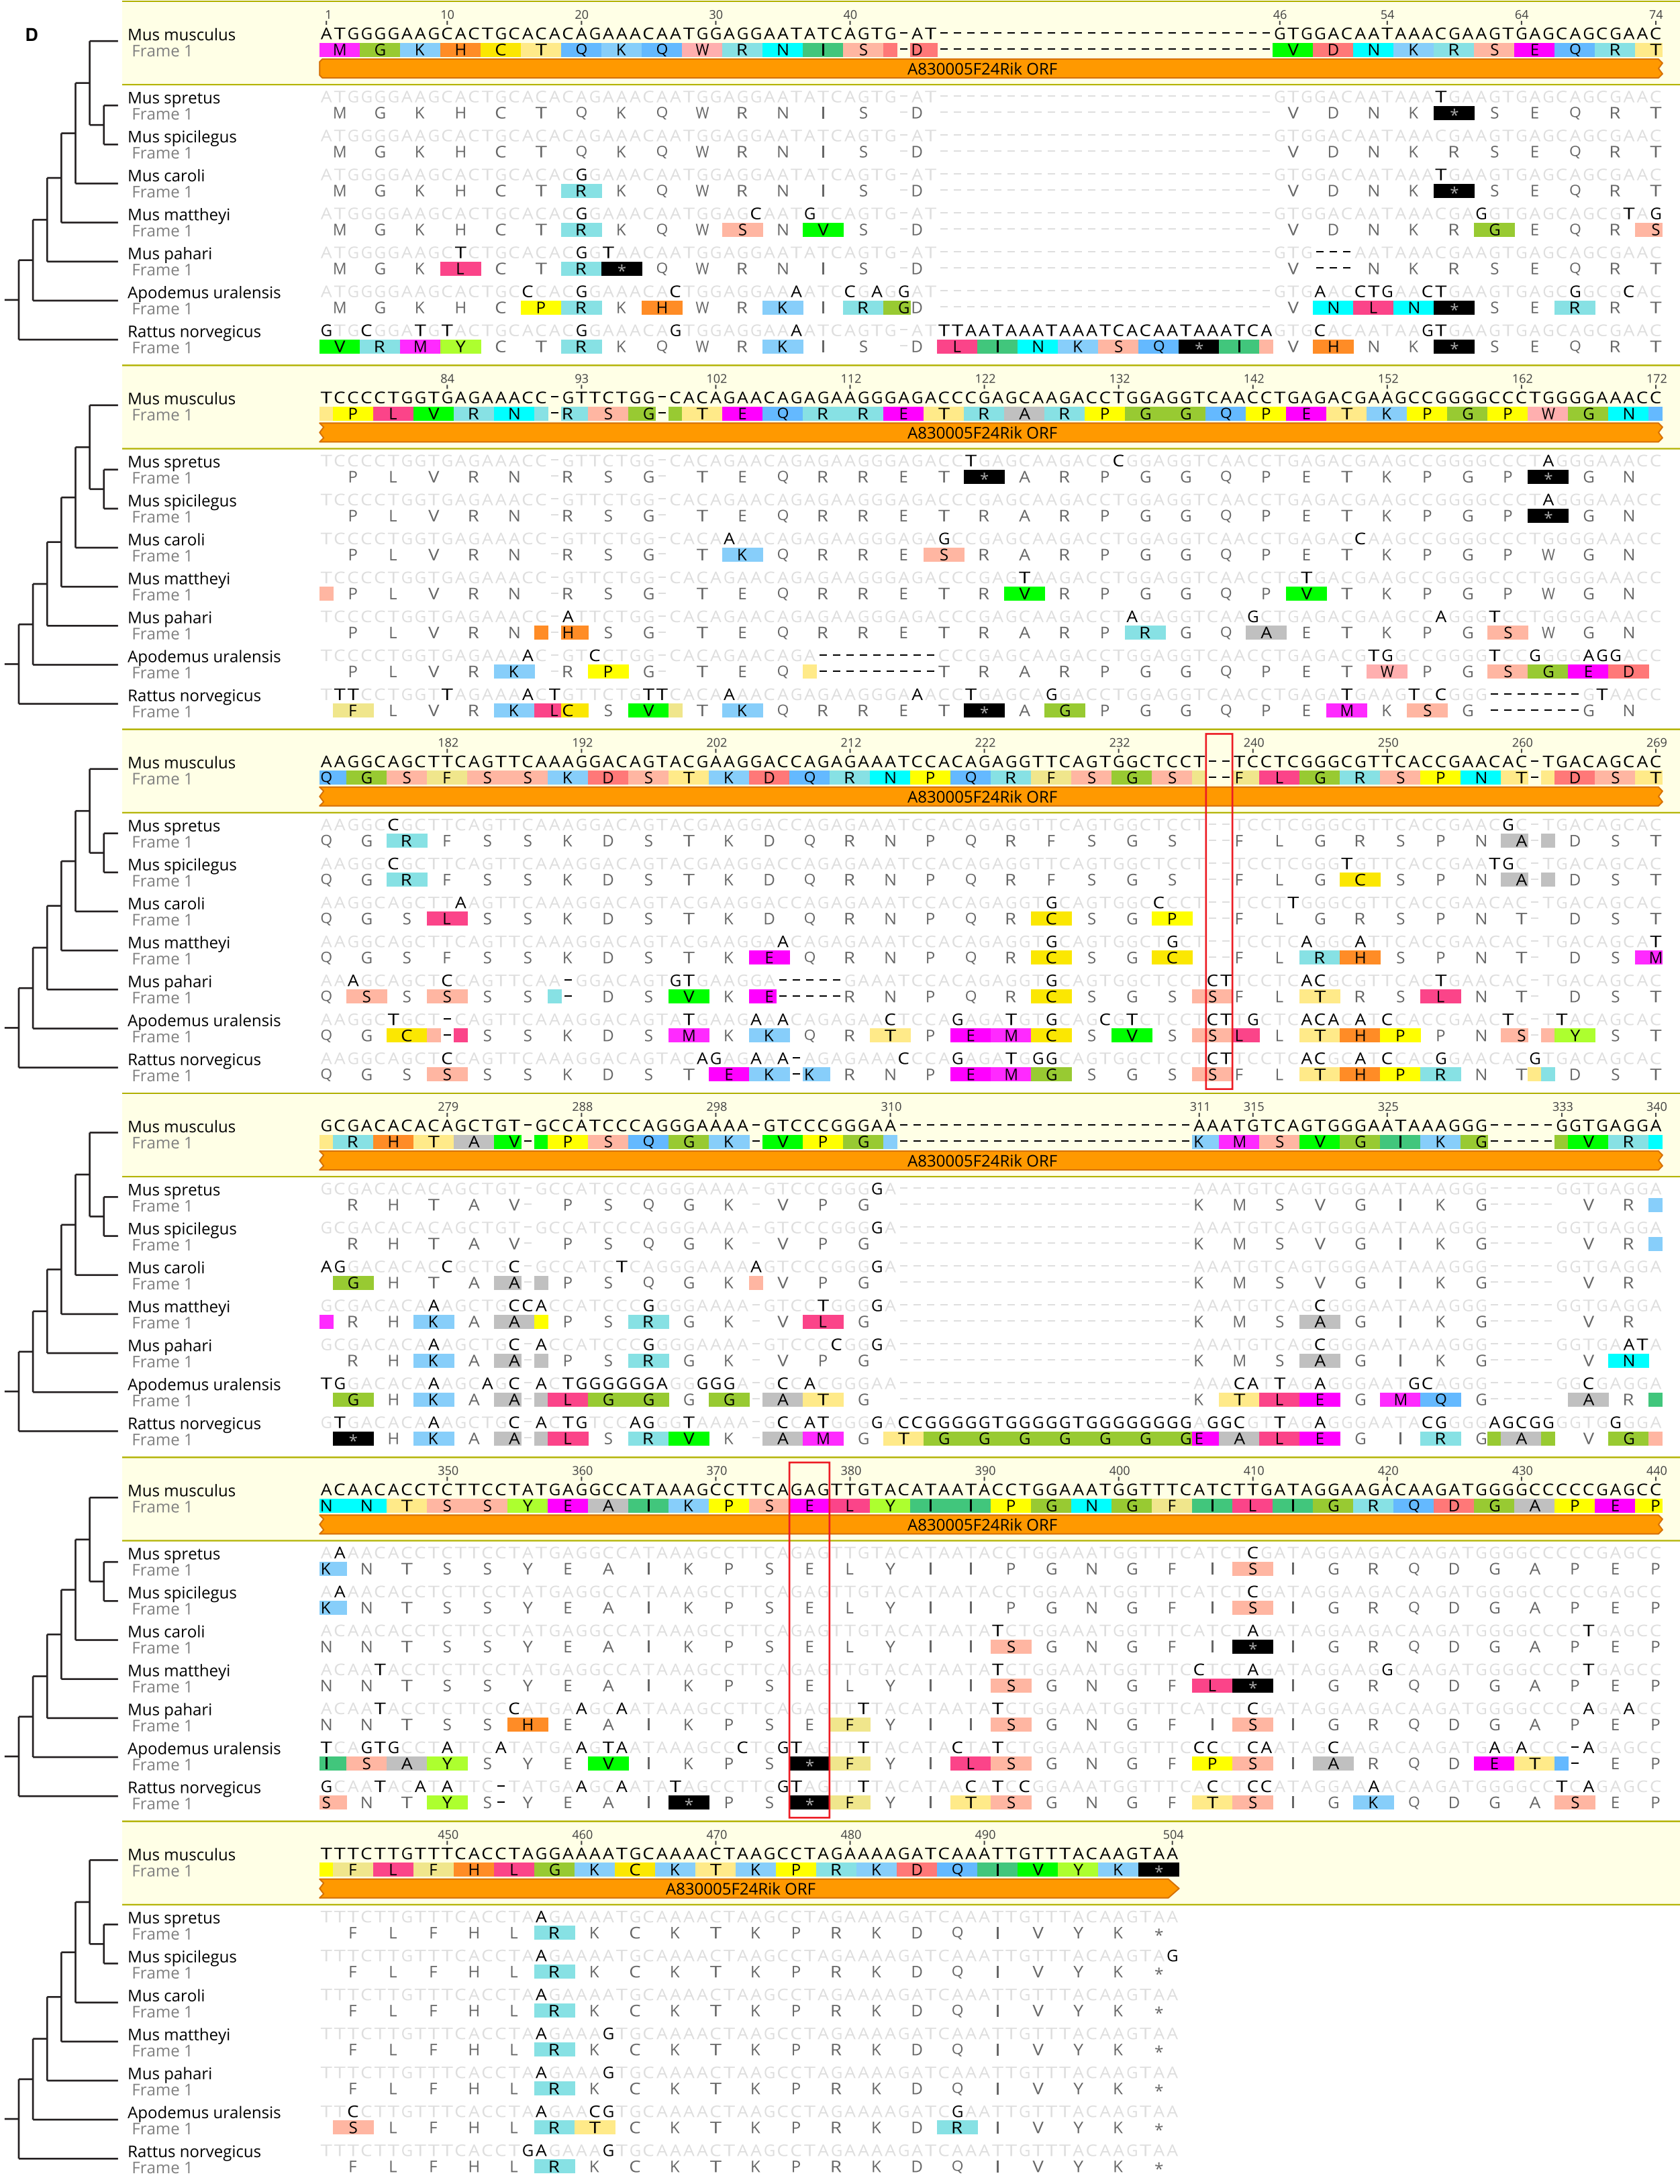

Supplement: S1 (10.1371/journal.pcbi.1008354.s001) [file journal.pcbi.1008354.s001]
