# Supplementary material for: Dedicated transcriptomics combined with power analysis lead to functional understanding of genes with weak phenotypic changes in knockout lines
Source: PLOS journal article supplement (doi:10.1371/journal.pcbi.1008354), 2020-11-12

### Supplemental Figure S2.

Results of PCA analysis with limb lengths. The three panels from top to bottom show the six PCs with explained variances.

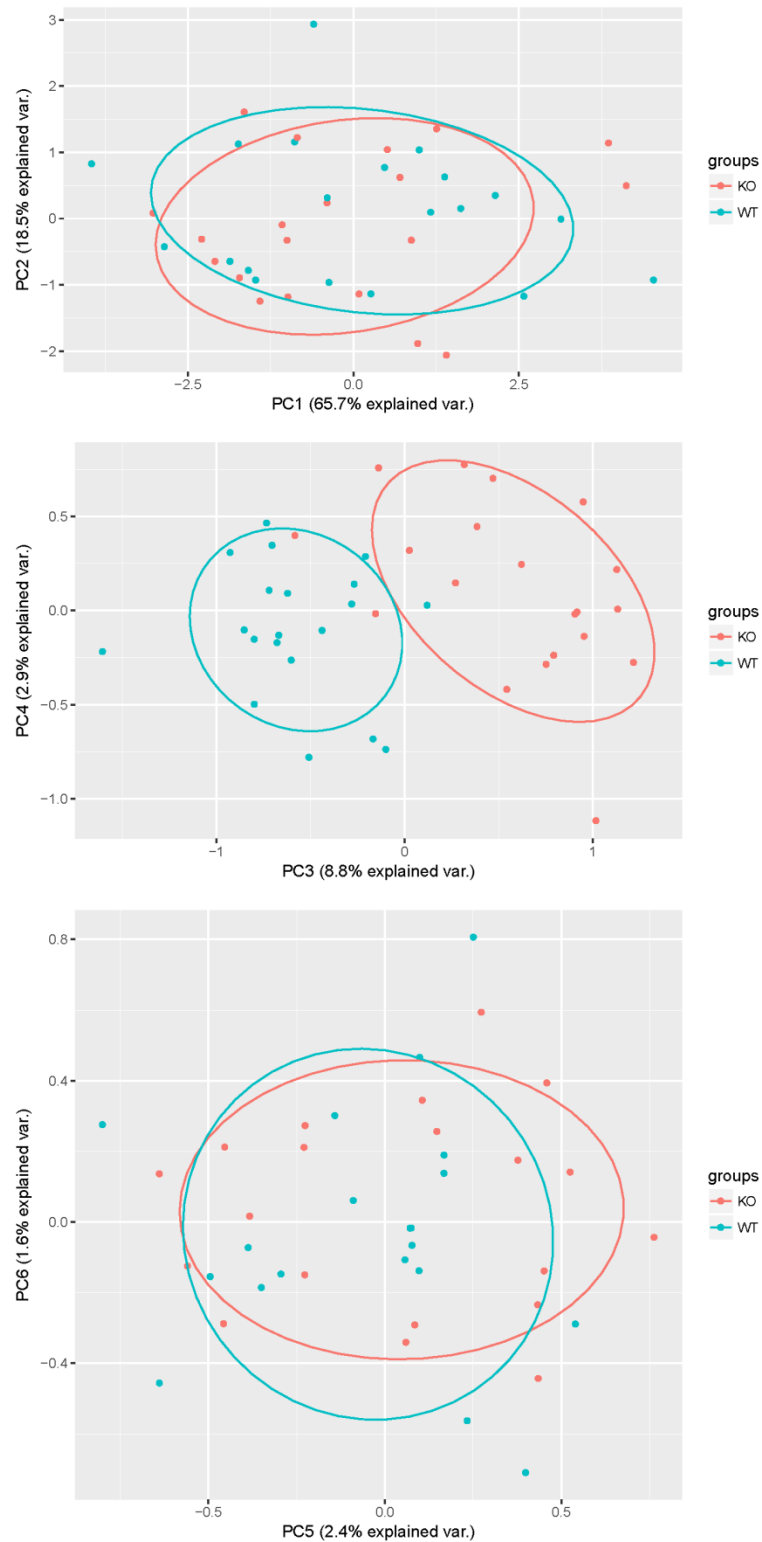

Supplement: S2 (10.1371/journal.pcbi.1008354.s002) [file journal.pcbi.1008354.s002]
