# Supplementary material for: Dedicated transcriptomics combined with power analysis lead to functional understanding of genes with weak phenotypic changes in knockout lines
Source: PLoS Comput Biol. 2020 Nov 12;16(11):e1008354. doi: 10.1371/journal.pcbi.1008354 (PMC7685438; doi:10.1371/journal.pcbi.1008354)
Supplement: S5 Table — It contains two sheets. (XLSX) [file pcbi.1008354.s007.xlsx]

## Sheet: Sample size
Simulation No.	Sample size
	3	4	5	6	7	8	9	10
1	2243	1225	3031	1235	6730	6914	6069	6966
2	3832	4	5469	3575	312	5488	6254	7324
3	2634	1009	2	4589	4172	7687	7007	7846
4	1	5058	16	897	5269	5675	5223	7895
5	1	6	215	2059	6420	5927	4976	8535
6	378	4085	359	5489	4195	6176	8076	7980
7	268	2115	1187	3227	6378	5429	7068	6463
8	423	657	2304	4957	5074	6308	6358	6705
9	313	3172	3636	5787	3744	5980	4954	7959
10	1897	2514	6370	1812	6099	5940	5893	7241
11	3981	1979	4033	5563	5360	2797	8080	6682
12	241	3821	2656	6427	2096	5190	6111	8437
13	2224	3209	3640	3892	2776	5072	6929	6816
14	308	2635	4907	3448	5425	6844	5538	6643
15	1	3561	1742	3345	3726	5168	6621	4198
16	95	451	1035	4661	4620	6856	5573	7968
17	11	50	1621	3361	5658	7177	7107	6532
18	1685	5807	4410	2456	1006	5566	7113	6760
19	150	2729	4273	5307	4796	3492	8294	6681
20	1106	4515	7297	3420	6417	7541	7054	6186
21	1176	992	1259	5421	3866	6438	7031	8060
22	1	182	2	6724	5512	9340	6458	6289
23	67	3827	939	4436	5151	6773	7036	6571
24	780	384	6	4911	4224	7543	7836	7633
25	4	5218	1963	4501	2451	6464	7482	7502
26	2999	2	1860	4983	4329	5891	7149	5902
27	1502	1491	3857	1111	3857	581	6128	8487
28	5560	30	506	4678	7037	5993	4719	6288
29	4504	2477	2333	5006	6081	7167	6575	5835
30	265	2	5128	52	3700	4226	6470	8326
31	4	4876	5203	1604	4911	6293	7134	7553
32	1	873	710	6915	3425	5496	6963	5913
33	7	3370	6702	86	2571	5892	6773	6920
34	1431	2214	4483	3873	7170	7864	6420	6994
35	548	3784	1968	3797	6451	4893	4190	6626
36	598	4359	460	4690	7091	4632	5570	8429
37	1718	520	40	4456	5733	8085	6490	7937
38	587	3510	633	6471	6739	7315	6629	5161
39	781	5037	3957	6155	6405	5098	8143	8448
40	1	4	1784	1162	3174	7458	7555	7901
41	45	3971	4480	4191	5984	4465	5964	7707
42	3950	6548	74	5378	7956	6341	5182	7367
43	72	1554	4722	4403	3922	8865	4231	6679
44	2	3	6569	4070	6114	3714	4675	7981
45	1319	802	2719	4207	4138	3837	6452	7487
46	2	4550	4294	7105	1063	3017	5966	7888
47	3299	3	3923	4356	6903	3613	6603	6765
48	6	19	1287	4132	4639	6547	5149	7548
49	1	3490	751	6766	7756	7454	6252	7474
50	2	2382	3912	5906	5952	6524	6502	8435
51	323	31	3530	5131	7093	5233	6342	6159
52	20	1002	3820	5738	1197	5165	6595	6990
53	1	1906	705	3741	4032	3617	4802	4904
54	3597	5347	477	3204	4395	4029	6971	8390
55	4	758	75	5473	3712	7059	6025	7900
56	680	4414	4815	5919	6036	5812	7772	7053
57	312	5	2996	3772	7165	6184	6748	5408
58	1306	2607	32	6517	3681	7051	5938	6014
59	1288	3894	1120	4271	4163	3228	6020	8828
60	3838	4069	217	4817	3298	7118	7796	6266
61	10	393	6684	5355	6321	6230	7226	6266
62	11	2	3651	5819	5686	6282	3868	5155
63	2558	1708	3685	7841	3627	5535	6462	7083
64	1088	4471	274	4999	4080	3270	5731	6786
65	2932	1021	557	4621	5155	6940	7076	6291
66	106	1	3665	4338	6461	5426	8192	6685
67	819	15	3309	5359	5248	7217	4585	6023
68	3	22	471	5424	5093	5862	7601	6619
69	303	2976	4678	2184	4421	3841	6223	6263
70	894	7735	6	5592	6272	6600	7046	7930
71	1862	3	5122	5314	4024	6875	5491	6175
72	2262	6157	5291	6782	6283	7033	7263	6754
73	62	1134	2860	2770	3695	4843	4855	7060
74	3137	1833	3350	6241	1674	5260	6135	7698
75	7488	41	4423	1290	3939	4772	4219	6640
76	3	6880	942	3978	5521	3382	6951	7908
77	281	3336	3816	3439	5087	6232	3677	6401
78	3960	556	719	1625	3427	4271	4332	7205
79	2697	5	5649	5116	5650	6877	7227	6902
80	40	1117	5534	2851	4226	6376	6873	7210
81	9	4361	1395	4965	5828	5695	6555	6477
82	2360	2628	4805	2902	4116	6269	7215	8417
83	2213	4634	4830	4451	3234	7693	6197	6813
84	86	4513	4784	5210	7043	6755	7049	7587
85	117	3845	152	2832	4995	6222	7573	6908
86	2	4480	1329	4618	5230	5086	8094	7232
87	3524	247	4548	3052	4655	4076	6979	8673
88	315	947	6219	954	3886	6936	5775	7037
89	2315	803	3682	1996	4988	4797	6856	7612
90	3028	1050	2408	2351	3719	8097	6002	6765
91	2165	3483	137	5836	4662	6123	7866	7752
92	218	5113	4659	3776	3281	4105	7637	7856
93	5971	564	3846	6888	5995	4928	6055	6124
94	559	3572	1026	3132	4033	7757	5995	6853
95	7088	1057	4758	7418	3583	3323	7665	6835
96	45	4142	5215	5106	4806	7506	6619	7696
97	6231	5607	2665	4063	3535	6682	6426	7862
98	526	5	3514	2840	4289	5905	5668	6052
99	20	2	3642	3623	2951	3360	6836	7385
100	1255	3	1781	1831	8571	4950	6423	7218
101	1807	5	3251	4940	4851	7335	6011	7773
102	4259	3937	5019	3610	5609	3609	7053	6290
103	1543	385	1012	6538	4224	7111	7420	6837
104	4791	555	1531	5972	2488	4573	6829	7134
105	5998	1	7430	7747	5314	5636	6259	6605
106	3342	1395	5580	2428	6199	4959	6873	7698
107	2276	2480	6081	5227	2364	3995	7020	6985
108	113	3778	1014	2403	5470	5824	5647	7208
109	1706	1515	3933	6456	6137	6264	4900	5828
110	8	6710	2140	6673	3360	7358	5944	8074
111	791	6285	1270	5337	5956	6950	7065	7111
112	496	120	3389	4003	5377	4713	6939	7487
113	2222	5813	3233	4241	1088	7520	7351	6079
114	137	5147	3652	3453	6123	5686	7944	7866
115	198	937	675	5142	4871	5678	5714	8202
116	2958	4136	5271	3620	6672	6482	5671	6191
117	2343	360	2554	4577	5963	1953	6936	5955
118	889	4078	3186	3462	5402	4551	6812	7476
119	5302	2644	2636	2835	7011	5902	7650	7778
120	1416	2563	5137	4040	8350	6043	7022	7760
121	1966	1	4664	4928	5291	5329	5269	6821
122	3518	6026	2551	3499	5291	7089	6840	8328
123	4768	3128	2432	4893	4304	6306	6764	5433
124	3	3074	3972	3408	2844	3729	4787	7375
125	3575	2570	2264	2095	5628	6710	5466	7888
126	5	4	1626	1693	3263	6753	6391	6140
127	2288	480	4473	11	6262	4281	7131	7311
128	2116	33	4720	5649	7949	5967	4985	6703
129	221	351	1445	4584	5390	7031	5584	7328
130	1140	106	5715	6377	1418	5671	7134	7877
131	3192	3163	1732	3749	2983	4167	4724	5930
132	4869	489	4883	7961	5857	6525	4403	6563
133	2666	959	8395	6907	5469	4354	5473	5265
134	1456	6205	3513	6707	5451	6186	3434	8220
135	49	1	7344	1978	4802	8010	5281	6540
136	17	5102	234	4464	4753	6837	5070	6432
137	5320	1355	3886	3845	4979	6375	5220	7541
138	529	32	2	2580	5904	6213	7163	7689
139	1151	1645	5602	7039	5201	5070	6786	7464
140	1208	3405	6793	4470	6032	5129	6534	7523
141	10	2956	2733	3358	7743	6820	4629	5350
142	2628	1979	2934	3100	4936	5323	5308	6779
143	3850	5	234	6841	6181	3993	7913	8072
144	2	908	3807	3931	5952	6567	5936	5690
145	46	5724	26	2734	4126	6343	7873	8302
146	0	5271	5617	4598	5289	6530	6859	7109
147	4801	7405	1876	2310	6748	8359	5291	6277
148	12	1416	3847	4567	5976	6206	6660	7089
149	1244	2957	12	7573	7549	6915	8128	8193
150	20	3305	2536	6053	1688	4547	6966	5509
151	185	1788	3187	2386	4218	6222	6479	6525
152	24	3474	5656	2724	8687	5971	3622	7762
153	2167	3229	5543	6119	6976	6671	6402	5299
154	3631	1582	719	2212	6927	8286	5148	6463
155	5174	4635	1389	5153	3945	4443	6458	6903
156	2768	17	2740	5419	6608	3763	7335	8154
157	3708	1172	5085	5484	2331	6750	6262	6208
158	2313	258	4146	1838	4484	4202	6431	6512
159	1	835	1187	6261	7588	4181	7267	6893
160	20	559	4621	5870	4377	7778	7210	7046
161	3652	3089	3196	3731	5649	4494	7279	5717
162	40	6377	4411	4710	6669	6839	6445	7790
163	4890	5507	2176	5256	6192	3334	7377	5716
164	432	10	2965	3333	5573	5970	7763	6337
165	1460	3846	4278	1917	7615	7341	8005	6834
166	861	5139	5640	2203	6291	7125	5866	6352
167	6445	2012	1198	1668	3481	6343	5611	7339
168	1919	3962	2624	4309	5700	6504	7466	5337
169	66	3701	3530	3427	3720	7286	5433	6525
170	3	55	2418	2791	4614	4085	6969	7735
171	2083	6165	1608	5019	2827	2351	6729	6506
172	347	1689	6995	4355	2147	5394	5444	6657
173	1320	421	5847	233	3472	6369	3641	6747
174	4461	1	2	7778	5568	6575	5792	5980
175	1601	5037	5236	3561	4119	6351	5232	7387
176	2548	2594	4334	6481	2243	4764	6895	5658
177	2	28	2885	4045	4502	3491	6520	6556
178	48	585	3572	3724	6891	7470	7094	6753
179	4759	2678	2951	3400	2794	6814	6176	6523
180	1240	6333	5700	5906	4607	7875	5384	8396
181	1043	669	4405	4605	1631	6449	6632	6008
182	54	1081	5214	5978	5438	2621	6719	8140
183	4005	4100	4852	6004	3828	6186	7978	6506
184	3948	3507	469	2625	7087	5989	7060	6876
185	1	3	5030	5464	6470	7373	5320	5625
186	11	2	4077	4683	4263	4452	4868	6101
187	10	4346	2433	3937	6467	5582	7138	7238
188	3587	2585	6098	3040	1838	6688	5775	7595
189	595	1	2410	5025	7723	5845	3794	6893
190	2563	1122	3475	4727	5274	7097	6018	7230
191	4279	4861	4432	5371	5060	5877	6665	8014
192	349	2674	3956	5429	7300	5512	7213	7573
193	378	128	3690	3656	7069	7653	8404	5943
194	891	5	3297	1109	4686	6575	6842	7520
195	1733	2449	43	2778	5918	6670	6374	6535
196	451	5257	3600	4430	4467	8208	6352	7614
197	701	1454	3072	4334	4980	4536	7848	6544
198	2202	6320	4422	298	4931	6736	5506	5982
199	1317	1637	835	4855	8386	5036	4754	6415
200	1558	3314	964	1231	5831	4868	5182	6472
201	168	1592	4676	3756	3472	4667	6517	7044
202	4	2997	3102	5208	7462	5649	6978	7377
203	3735	12	3323	1728	6088	6057	5450	6512
204	7	1	7947	5432	7416	6170	7743	6021
205	6743	48	5358	3023	2079	5405	7149	7400
206	119	3207	2202	308	3923	6234	7161	5036
207	298	629	1964	29	5315	4860	3480	7842
208	240	4197	3779	3	2572	6940	7776	6738
209	25	6939	2235	3410	6854	8047	4765	6854
210	2440	1	1010	3671	3126	4688	5435	7393
211	3568	5	2769	3046	2247	7063	8026	5430
212	796	2703	3757	4922	3909	4100	2461	6938
213	1848	3729	1281	2329	2545	6244	7207	7081
214	5504	4203	3561	5041	757	6122	5122	7346
215	1971	627	2105	7263	3315	7050	6343	6918
216	2509	3400	6532	3896	4943	7156	6096	6364
217	5	3579	4148	2187	6158	7856	6838	6643
218	1619	965	1752	2753	4284	5916	4301	8916
219	915	5415	1442	7235	7156	3528	4763	5418
220	670	785	7196	6356	3959	3878	7279	6851
221	358	1178	5055	5638	6722	4600	6585	8238
222	1	85	4862	3660	4421	5927	6321	7632
223	1005	2809	2913	5138	7302	5703	4748	8075
224	1648	1985	2850	6319	6041	4215	5249	7983
225	1768	1	4269	4249	2661	3618	6013	5885
226	2370	4313	5885	2062	3612	2371	6966	6435
227	7086	3379	974	2887	7189	6378	5771	6273
228	412	292	2589	3169	5730	5137	8183	7800
229	395	1747	868	3659	7199	6717	8522	6515
230	1506	5728	0	6381	7683	4323	7698	5017
231	138	2421	1462	6181	6549	7132	6735	8325
232	54	1762	3717	4397	5118	6074	8358	6569
233	2	3725	3263	5058	5340	7078	7021	7094
234	2526	5895	4760	5058	5163	1100	7032	6799
235	104	1635	2081	7	3864	7107	6977	7683
236	221	0	951	335	4272	5845	8101	6741
237	2	4907	629	4404	4908	4989	7304	8188
238	291	1508	1346	123	5647	8957	5629	7102
239	524	1188	1	4448	5482	2849	5979	7992
240	205	1	4105	5174	2718	5100	6153	6642
241	821	43	2660	6353	3440	3236	8856	6898
242	1	2538	4210	5306	6272	7803	5934	5989
243	3475	6112	4578	2167	2436	5833	7675	5487
244	1288	678	4074	2239	4017	4911	4426	6787
245	1760	216	3655	6007	6671	6153	7671	5555
246	2224	2803	65	5335	2893	7645	6585	7363
247	1233	4666	1631	7596	6791	6083	6468	6729
248	703	917	5167	3692	5153	6324	5916	7984
249	2465	1	1328	2473	4092	5086	7059	7302
250	73	3825	1275	2305	5310	4727	6062	7013
251	1	16	5482	3741	2708	7210	6497	6839
252	1358	3484	5411	4731	2962	5970	7520	6137
253	2272	320	4935	3202	6014	7088	5093	5708
254	922	3612	2176	3101	6029	6396	7894	5184
255	1	2569	2117	4315	5240	4797	7924	6251
256	4024	847	1669	2842	3799	4203	7415	6360
257	3965	1229	3210	4650	364	6592	6598	5773
258	3362	4131	3	2039	5814	8169	6096	6980
259	6135	420	561	2500	4729	7080	4832	7207
260	2911	4473	2286	2682	5643	3916	7687	6052
261	1	3285	5479	3254	7836	4792	5566	8044
262	6	5467	3369	687	6847	7793	5690	7734
263	65	3470	558	1167	5048	4534	3249	6993
264	8	4583	1462	5500	5041	5448	5197	6463
265	1871	5930	6038	2541	5412	7857	6288	6942
266	1184	174	3	3487	3971	3202	6973	6538
267	2262	9	1	1797	3486	6497	5844	7205
268	260	3113	5708	4930	3142	8079	6220	7554
269	805	1762	5875	4865	6760	3172	7152	7931
270	87	841	6959	4161	3413	6041	6868	7765
271	195	325	5278	8023	6625	6913	6559	7460
272	3270	7	2547	2428	5676	5698	8023	6742
273	1203	4155	1321	295	5657	2536	6978	7524
274	1519	109	1914	3529	5010	5473	8183	6501
275	545	4	5808	7070	2618	6501	4922	6207
276	4615	2635	9	885	4547	4738	5160	7715
277	3052	3552	3938	4293	6876	4704	6519	7549
278	1191	3020	2143	1538	6742	6360	6697	7541
279	409	2810	3958	5798	7087	7332	5784	8044
280	87	4503	5841	1174	7363	8056	7050	6583
281	6393	2326	2652	1693	4311	4921	6598	7332
282	7550	5046	2574	6948	4583	3224	6458	6511
283	4948	4345	2012	2427	5670	4612	5244	7591
284	22	3064	2088	7437	5830	5606	7157	6170
285	4127	7087	6776	5232	6692	5750	6456	7158
286	1797	4833	1885	3883	3644	6608	6214	6824
287	1107	987	3626	1379	6166	6001	6760	5982
288	4	3503	6114	4726	5358	7583	7182	7217
289	519	5	1327	5069	3660	3741	3340	7790
290	1948	621	850	1117	5786	8292	6971	7599
291	787	30	3890	578	2054	6030	7802	5779
292	123	3520	1274	3063	4019	6255	6025	6400
293	25	64	3671	2357	6699	3948	4166	7563
294	447	96	4272	3590	7477	2639	6160	8121
295	3386	3312	3163	4091	4573	6255	7522	7781
296	2	1229	2152	4246	4647	5141	6028	8433
297	429	6441	5174	3366	5858	7071	5972	6337
298	1600	5457	3891	2550	3934	7260	6006	7623
299	1370	1461	291	5824	3090	5782	6660	7043
300	2	7021	3713	4487	5832	6672	5028	5750
301	2	1624	5673	4418	4699	2316	6892	7991
302	2565	1183	5595	1944	6741	6683	5899	6503
303	6334	511	4783	3058	5194	6304	7178	6760
304	331	1	316	1880	3993	7046	4143	7090
305	814	4509	3788	2837	5732	5778	7876	6972
306	3585	448	7598	1674	2267	4217	4312	7208
307	502	1935	4841	7788	5105	5537	5884	7903
308	1469	1335	4440	4772	6005	5735	5660	7911
309	1460	2609	2575	2364	7570	3111	7692	6028
310	3849	1275	2478	2996	6076	6722	5032	7094
311	2	6747	3982	4496	3377	5056	5703	8019
312	2235	3501	3143	3358	6115	7329	7258	5917
313	6062	7068	6805	157	4990	6427	5511	5470
314	2170	2	5893	4527	5765	3627	3481	6975
315	1895	2291	5192	2500	4176	5359	5382	7234
316	2798	2575	6576	3611	6667	5753	4318	5440
317	371	3068	3853	4111	3694	6418	4505	7156
318	5	1397	4831	4986	5106	2851	5962	7630
319	993	1781	2251	3450	2552	6879	8254	7812
320	866	6157	5895	6503	4553	3697	6189	8319
321	1568	1054	5205	4435	4058	5788	5932	7806
322	2373	621	387	4348	4539	3379	6362	5198
323	159	3	2971	6391	3903	5233	7843	6800
324	3003	4658	3529	6983	6261	4783	6545	7174
325	17	916	2752	4696	3693	6647	5771	7890
326	1581	1984	5802	1912	4101	4707	4835	6435
327	675	435	3416	5229	5793	6154	6129	6342
328	83	949	3313	3640	4058	2924	6566	8030
329	3374	4626	5542	6190	1654	7194	5261	5860
330	471	1823	1301	5694	4305	6277	6937	6606
331	1215	2929	2902	6397	4852	3473	5789	6522
332	2019	275	4219	5039	6849	7117	7026	7697
333	182	1	5810	3946	6804	4547	7462	6813
334	247	1425	697	3665	6292	7775	5451	6087
335	1726	3193	735	3091	4646	4564	4354	6993
336	37	3489	6270	974	5283	6858	7605	7583
337	1481	4044	8164	6959	4976	7349	7885	7514
338	2308	1141	1149	6116	6845	5138	6698	7011
339	335	52	174	5495	7418	5188	6506	5862
340	4618	4940	4466	3843	4211	4456	5793	6566
341	940	1859	3700	4726	5494	5094	7019	7305
342	956	423	2265	3772	6225	6687	7064	6006
343	403	1736	728	6286	6057	6661	8705	5940
344	1584	6881	526	6317	4195	5351	3786	6108
345	19	5	3828	4646	1208	6878	8381	4908
346	6191	1056	1907	1901	7172	7336	4478	6628
347	62	2404	4	5275	7290	3377	7050	7025
348	2725	1100	58	6285	4350	3712	5977	7425
349	603	2078	3569	2873	5735	6778	5993	7829
350	709	2536	6107	5377	6227	3327	5586	7082
351	664	16	1692	4412	4114	7596	8055	6677
352	5876	1211	1051	5572	3542	4813	6608	6849
353	3603	326	4341	3110	5715	6617	4105	6975
354	23	521	5517	2161	5341	5981	6686	7268
355	4338	2041	2667	6704	6738	5473	6566	6578
356	574	3578	269	1984	6996	6259	5891	7783
357	1897	5294	1509	2424	4852	4596	7671	4510
358	1895	821	2254	22	5934	8613	7424	4009
359	1897	5119	1232	5863	6376	4289	5281	8233
360	3832	2977	1619	4197	5925	6982	7559	6985
361	4	0	5823	6251	3918	6130	6589	6670
362	1	2377	4669	1564	5585	4417	4287	7591
363	6040	4470	1320	2389	1840	4629	7134	7028
364	3050	3	3303	3216	3038	3475	3215	6797
365	315	7072	2204	4729	1143	6528	4894	6695
366	1980	2826	2250	4697	5948	3333	5195	6828
367	1023	5762	439	6528	5152	6224	7410	6193
368	63	4812	2700	5556	4473	6425	6514	6771
369	785	3100	2257	6216	6213	7259	6366	7015
370	2301	259	3336	1902	5374	7350	6036	7724
371	3952	1549	5192	2799	6528	4929	6294	5765
372	2	1	6008	4837	5477	5678	6407	5664
373	210	610	4258	4813	5085	6529	4387	7160
374	818	2309	5727	2109	1662	7345	7464	7453
375	511	1288	6121	6046	7695	5505	7637	6777
376	29	156	5	6764	7266	5797	7154	7602
377	1377	4488	2895	8372	5245	5943	6039	8984
378	13	3326	3531	3130	5858	4932	6008	5866
379	1286	2573	85	2160	6359	7634	6714	6897
380	1973	2909	927	2171	7318	7489	5900	6823
381	208	3189	83	3463	6466	6897	7343	8197
382	618	1433	3506	1118	3230	3842	6824	7831
383	1257	375	629	1436	5821	5597	6709	7876
384	28	8135	5431	2353	3955	7613	6870	6670
385	3622	2	7741	6490	6423	6580	6232	8541
386	79	1508	2208	6310	6851	5348	7428	7482
387	811	3680	2561	2133	5498	6850	5990	6507
388	3235	2150	5502	2506	3380	5648	6095	6753
389	5196	1953	3	4495	2399	4075	5364	8268
390	393	4600	4538	4380	4040	5659	5131	5047
391	3024	3508	4765	2246	1777	6314	4826	7251
392	1	708	2	1851	4502	7999	4631	6671
393	926	5652	2928	3998	6312	6322	8064	6428
394	6797	1281	3982	5420	6574	3637	7393	6292
395	1310	1257	3677	2951	7926	6367	6636	7290
396	1	1282	5188	6069	3796	7372	6173	7485
397	246	2880	5	780	5891	5508	7520	7842
398	4239	7000	3488	881	3037	6228	7781	6959
399	1011	1193	4867	3913	1358	5144	6484	7238
400	543	7728	7742	3903	7781	6117	6395	6719
401	5294	1357	3447	3133	2645	6638	5531	7318
402	11	1373	4484	2498	5706	6588	6962	6834
403	2761	2499	4314	3441	3996	6453	6103	6726
404	609	4	3751	4061	2430	6387	5547	6123
405	2656	2801	1042	2415	4310	4651	6388	8448
406	2285	1324	4633	3049	4549	6098	5500	6855
407	485	2	8	728	7160	5687	7828	7147
408	2990	163	3956	4224	3459	6869	4249	8647
409	1457	4637	3272	3745	7036	3980	8330	7011
410	53	1874	3835	3832	6450	6257	6599	5518
411	91	3034	4800	4286	5368	7470	3030	6079
412	1836	1032	5427	1576	2776	5509	6978	7126
413	47	4452	3077	4939	2923	6960	5047	7243
414	1	1279	1056	5155	1846	5913	6215	7356
415	61	2516	3821	2443	3414	6406	6190	7030
416	1376	5221	1024	5082	4582	6619	6607	5657
417	1389	3891	1405	4228	4928	6605	8135	8639
418	3448	3295	371	4179	4129	5106	6691	7457
419	32	3140	2390	5423	4795	7225	6043	6682
420	52	2434	5968	3177	3271	5414	6640	7857
421	1395	5253	4358	4451	6271	5121	7197	8294
422	3355	4	2348	5810	4125	6870	5898	6591
423	1382	2813	1865	102	5338	4954	7131	6886
424	2380	6835	7221	7135	4228	6067	6611	5575
425	21	1444	4811	6305	4090	6485	7080	8043
426	3921	5	5290	5110	4890	5374	6599	7478
427	44	92	3056	57	6184	5568	4868	6480
428	1329	13	1170	1668	7736	5492	7654	6610
429	22	1344	4575	4054	6697	1919	6727	5908
430	785	441	5657	1808	3756	7570	5042	8036
431	22	6893	4529	2461	3220	5921	5554	7048
432	1	1470	5086	5254	7608	3010	7940	7370
433	6141	2980	4332	999	1491	6971	6662	7323
434	2368	4085	2385	5996	4001	6017	6767	6210
435	2305	1	1	4636	7090	6039	5618	5605
436	1201	868	6442	3980	4864	5407	6331	8712
437	2016	2084	252	6054	2591	5870	6581	5295
438	1030	453	5658	5100	5760	5615	5372	8142
439	11	5555	1566	1990	5034	6208	8653	7802
440	2645	4371	6190	432	7255	6955	5715	7209
441	2757	4	3940	6233	6068	7281	6906	7040
442	208	586	3717	1566	6671	5287	6059	7680
443	1507	295	3387	585	6605	5242	6586	6439
444	1864	3638	5285	332	6064	5474	6349	5653
445	1333	2550	178	3652	4839	5985	8301	6706
446	1661	3741	6	4117	3333	5816	7378	8254
447	6153	2631	4439	4092	3267	5555	7324	6551
448	571	2	4284	49	5308	5551	5948	7469
449	726	31	4352	5277	5496	5454	7052	6612
450	3794	681	4330	6418	6367	5592	6710	5790
451	1071	531	4	5218	6773	5991	6375	7177
452	473	2	1480	4268	3699	7286	5289	5227
453	263	2681	4883	6601	3956	4789	5575	7418
454	2	3507	3923	4091	3127	5663	6628	7614
455	2938	2594	3683	3013	3054	6610	7380	6210
456	1151	2438	3	2616	4927	5738	5421	7812
457	3759	942	4602	6435	4592	5658	6730	5420
458	628	111	4377	4350	5001	6243	6648	6949
459	155	5	4931	6073	3304	5341	7088	7080
460	146	2924	6403	1169	7345	5306	6109	7573
461	754	1558	1521	6500	3745	4670	6575	6770
462	988	5089	3622	3646	5336	5718	6544	6250
463	2	565	6850	2989	3684	2623	6175	6851
464	5758	3324	3851	9262	4547	6238	6450	5197
465	5403	1346	1081	4644	7708	7291	7288	6214
466	2127	2176	5502	1418	7443	8303	5444	4991
467	56	5613	4237	3608	2210	7457	5470	6600
468	12	2596	3051	8800	8812	5363	8226	6649
469	107	5775	3208	6414	5828	3303	8015	7214
470	1	6924	3448	6725	4775	5446	6415	7751
471	3337	1163	5503	5862	4450	5413	5744	5823
472	11	3276	4658	4908	4319	5433	6281	6997
473	710	118	0	7060	2264	6665	4919	7360
474	1328	1971	1716	3689	2229	6913	7759	7422
475	15	720	2063	1003	3302	6655	6797	7341
476	5424	6031	4523	1651	5230	6181	6894	7548
477	756	307	2317	3813	5351	3889	6295	5596
478	1631	1211	5671	2816	6010	6322	6508	7075
479	2205	6189	3025	26	3872	5590	5476	4671
480	61	364	975	5741	2308	4546	7570	6542
481	3	194	2940	2245	5996	5526	8077	8428
482	107	6248	115	5293	5541	5329	8119	6154
483	160	3514	6014	5533	4605	4954	5685	5591
484	1548	5213	4199	5711	6841	4377	7321	7576
485	1740	1261	3757	5911	4049	6136	6190	7530
486	10	2373	5381	4157	6219	5722	6993	6012
487	5415	2713	1205	135	6339	5494	5652	7030
488	5	7167	4619	4644	7939	6048	6908	7655
489	1	4484	4013	1772	5606	6606	4976	5395
490	3839	330	7146	3364	6115	6673	6433	6354
491	21	368	7226	3863	6634	2720	4684	5940
492	71	4	5618	1645	6357	6298	5348	8127
493	2828	2	4279	1443	4731	3843	2410	5297
494	172	3085	4468	1490	1398	4655	8048	8412
495	2118	1389	559	4280	4601	8524	7440	6670
496	1763	3294	2680	476	5600	5335	5596	6855
497	881	167	5185	5445	5560	6778	5936	7593
498	782	14	7327	3774	4315	6210	6892	8576
499	824	2231	2888	6337	2424	5512	7995	7244
500	1471	2968	5844	3653	5401	4334	7294	7639
501	3778	2649	5520	2031	3225	6626	6703	7755
502	1220	3533	4091	2493	6533	6690	6448	8291
503	1135	4	112	1762	3525	7551	6343	7067
504	603	4066	1319	2347	6097	6063	5400	7822
505	973	2899	5356	4098	5669	7818	5978	8187
506	131	3242	4651	1352	3312	6193	5745	5562
507	4929	357	5586	3678	3733	8209	4498	6413
508	2621	3739	5298	4419	2142	5807	6386	7790
509	6	3336	3197	4684	4589	4588	6534	6863
510	797	3340	488	626	5537	7112	7132	6464
511	5123	42	250	1850	6364	7526	6591	7186
512	1748	2895	6911	2456	7203	4032	6889	7314
513	4	184	5186	2772	2495	6185	7992	7040
514	2973	1982	4740	1839	3123	5299	5264	6067
515	9	5425	5287	3479	3939	6995	7604	5528
516	5	26	1277	4802	2779	5218	7778	8150
517	638	4734	3769	3996	5490	7696	5686	5307
518	1055	1599	5597	3364	7081	6850	5466	7866
519	132	1914	0	5350	3007	6663	5374	7121
520	140	34	1569	6811	5337	6759	7477	6903
521	4359	4622	3248	5773	7037	2498	6330	7747
522	105	3859	69	2358	1818	2609	7291	6101
523	1198	951	2144	4848	4425	5753	7387	5827
524	146	5389	4053	7511	2700	5032	6200	5589
525	3952	1055	3003	7120	5406	6078	5882	6334
526	7	2	1873	4132	5440	5069	7147	6143
527	232	1	1600	6596	5399	5765	7011	7642
528	387	1238	4282	1217	4493	4157	4277	7129
529	1	2700	3296	400	5861	4934	5432	8013
530	2748	3917	6261	1860	3690	3833	6792	6252
531	4426	4985	3954	3111	4958	4546	4948	6136
532	719	1313	3974	3635	5708	4403	7749	6849
533	858	7	2993	4699	7591	7008	3340	5590
534	3298	2100	3079	6930	3674	7260	5543	7179
535	429	1287	4685	1550	6114	3341	7784	5100
536	1492	4403	3505	6616	2050	6086	3915	3984
537	3918	11	5796	304	4192	5512	8707	7677
538	148	356	6820	1979	6041	4671	8237	6501
539	1998	3845	3863	3496	6557	4871	7135	6717
540	2	4265	1785	6650	4035	5451	6067	7007
541	141	4318	4420	3033	4934	6142	4199	6164
542	919	524	89	2109	5867	5208	7375	8233
543	2579	157	3369	3515	5709	5254	6307	5774
544	615	4354	5327	6537	3560	6666	5944	6103
545	17	2	278	3194	8518	6887	5416	6647
546	33	3714	2394	2854	7474	7763	5976	7387
547	440	3149	2997	4574	4580	3467	6708	7144
548	1152	4361	6555	5532	4881	4790	8436	7820
549	2704	4615	5878	5516	3818	4198	4239	6874
550	399	1924	3861	24	6465	7653	6622	5861
551	1044	4906	5214	2679	5281	4851	5059	6699
552	6961	13	4493	3758	3444	6021	7862	7315
553	3103	1723	4327	3992	5378	5831	6544	4895
554	993	4114	2	1671	5823	5038	5938	7795
555	2111	627	5811	5625	2098	4379	6105	5886
556	3408	4626	2022	5411	6232	5083	5434	5856
557	1505	5258	3	2961	5509	6526	8073	9041
558	68	902	2197	6424	5376	7197	7913	6468
559	8	319	3015	3831	3755	4552	6671	7695
560	4684	1451	3671	5880	3925	3821	4935	7684
561	1596	4032	6398	3815	7040	8250	6266	7285
562	1684	2815	1135	6452	3490	2508	4592	6670
563	1014	2550	3301	4555	7564	6617	7392	6072
564	2131	1764	19	7134	3982	6635	8100	6062
565	1548	2817	3270	5302	3752	5326	5777	5685
566	90	332	6329	5163	6069	7589	7334	8069
567	3	2367	391	4027	2863	7240	6600	6149
568	268	505	2345	4896	6017	6785	5596	5727
569	4333	1052	2433	6689	5215	5315	6688	5677
570	1	1491	5054	5364	4617	6229	4479	6433
571	3662	4594	2	6599	7259	4593	4798	7060
572	44	6314	5560	6917	5038	5724	8328	7937
573	633	3809	694	7526	4622	5890	5914	7186
574	4	1927	2530	2957	5012	4679	8256	5795
575	3844	1808	5404	4328	6331	6751	6351	6927
576	256	4316	5499	5754	6207	8649	8086	8175
577	10	5592	424	4317	4190	8208	6876	5369
578	2	2103	4052	4205	6162	5640	6283	7666
579	1	5845	3712	2759	6588	4784	6426	7422
580	1826	1581	348	4979	4760	4450	6016	6586
581	3609	2515	1816	5658	1220	6806	4730	7713
582	2858	105	7230	5275	4824	6717	5052	7574
583	2954	6855	4450	3272	4687	5520	4492	6694
584	1300	2824	612	3996	2070	4842	8079	5904
585	0	2001	2630	5641	4877	7811	6054	6463
586	3290	3253	5892	2398	6954	3320	4973	7330
587	2336	3496	1626	3010	3960	6659	6380	7262
588	2	744	5867	8341	6708	7525	6521	7919
589	13	4396	8437	5764	4387	2887	6710	6422
590	3848	2318	5564	3789	5779	5560	6427	7839
591	461	5323	3473	4942	6110	7423	5971	7227
592	3662	4761	6853	5406	6074	7877	7368	8614
593	1516	512	4044	1824	6895	5952	6255	8360
594	0	6	8287	5191	6237	7112	8008	7091
595	872	52	3456	2340	3472	6860	4683	6669
596	450	2200	3989	2027	6705	5117	6659	6353
597	1319	6501	4463	3429	3849	6482	6203	7673
598	1595	4347	8	5540	6735	4850	5682	5885
599	81	5197	2348	3706	6727	5768	7411	7931
600	2315	1116	2746	1971	5547	6219	5053	5575
601	435	131	6152	5154	6621	4572	7290	6852
602	2517	13	5402	1332	4389	5706	5580	8345
603	1177	4192	5326	4307	5365	7907	6160	5985
604	1098	4037	9	1762	5860	4211	7919	6553
605	4308	1973	4193	4470	5195	8061	6238	7775
606	1701	774	3259	3117	5933	6276	7031	7186
607	5878	3402	4768	4396	3849	8349	5283	8466
608	191	24	1262	2106	5083	5721	5989	5113
609	304	3827	4126	2890	5223	3676	6800	6694
610	1548	4302	4580	7478	4701	4520	5273	7753
611	1694	857	2512	4864	708	6664	6009	6374
612	1294	1106	4332	6804	5393	7169	7193	7821
613	133	3	2761	1265	6132	7521	6553	5607
614	1	3874	3111	5610	5910	3268	5638	6692
615	1799	6977	3768	7954	3219	6698	6018	6811
616	2721	2559	582	2757	5776	5946	6785	7376
617	2	5150	1137	1732	5491	7921	7391	6007
618	1037	365	4552	2814	3061	6432	6228	8178
619	147	2487	2336	1011	4708	7065	6695	5518
620	1483	3526	2289	7074	5891	5090	6439	7079
621	647	4987	575	3498	3493	6302	7281	6930
622	4937	332	2299	4694	5983	7088	8475	7955
623	2493	24	131	3371	323	6990	5221	7347
624	3	7	485	2551	7314	6143	5854	7911
625	4	701	730	3687	3494	7833	7501	8129
626	277	2550	4227	6097	5033	6762	6780	4458
627	1947	2587	3075	5501	3426	6614	7105	6446
628	4870	722	4595	3742	4802	6642	4522	5782
629	52	2332	5104	6012	3560	5775	5599	7326
630	2675	3503	5119	6140	3789	7039	6580	8198
631	339	4115	229	5791	6840	4908	6166	7079
632	266	20	1941	2095	4967	6806	6103	6429
633	3259	2723	3999	1986	3001	5343	5574	7568
634	2438	2494	4327	3681	5766	7072	4137	7365
635	9	7	3910	5499	5583	5357	7914	6293
636	1	4197	2551	5741	5447	3886	6349	8011
637	4	2699	3282	3211	6302	7598	7251	5820
638	2735	4550	3704	4099	5255	5938	5345	6852
639	662	4105	3468	7811	8545	5534	5909	7024
640	7650	3717	4156	2401	3784	4605	6399	5090
641	348	1781	4144	33	5670	6508	6292	6979
642	67	1793	2542	1696	3333	3508	7470	7146
643	1906	452	2273	4637	6465	5468	7562	7769
644	896	40	4155	3860	4057	1706	3608	7756
645	3092	887	3503	6973	3927	3858	7206	5165
646	2104	5020	4091	3948	4986	6181	7601	5802
647	4247	4821	5078	6783	3981	7326	6707	6528
648	2330	5784	4097	6144	7464	6036	5139	6621
649	91	3594	5292	4084	3755	7204	7123	7865
650	2200	8	6468	131	7125	4610	7196	6820
651	178	3551	1353	4169	2601	7857	6888	7869
652	5258	692	89	8	3793	5805	6922	6346
653	516	5620	2550	4840	5479	8089	6055	5991
654	46	234	2408	3073	3889	6190	5364	7635
655	34	452	4379	2489	2681	5906	4743	5377
656	2942	442	2999	6100	3780	1799	5590	7511
657	38	222	3866	3219	4178	6631	5910	7519
658	8	4852	3163	3583	6748	7944	5976	7990
659	2	4498	1529	5946	2793	3880	7886	8199
660	2556	1195	2578	4644	4400	6213	6686	4861
661	11	236	3836	4196	5279	6362	5645	7012
662	307	7015	5209	5983	6135	4436	6444	7227
663	3	6089	2878	7562	6624	6432	5602	7806
664	6	2734	1567	6355	1165	8547	6372	5581
665	36	3569	4478	1085	5971	6279	6217	7991
666	5488	1047	6090	5431	4692	6559	5674	6975
667	953	1043	4753	1386	8293	6537	3721	4611
668	63	7886	6698	5353	7067	8274	5012	6145
669	1993	1550	5713	3124	5447	7557	5877	6270
670	2041	6120	5	288	7321	4370	5802	6692
671	447	922	3364	1364	5305	5828	6273	7732
672	437	25	145	5322	6872	6877	6097	6135
673	1	1426	94	7228	4315	3798	5687	7642
674	5617	3063	745	3929	4730	5183	6168	6265
675	2	4	18	5291	3004	5540	8495	6268
676	390	6404	2129	5383	2566	4018	6024	6795
677	38	1	6949	6040	6925	6184	7179	7313
678	3	1042	6278	1551	1366	7123	7102	6126
679	3499	3806	4443	4865	5943	7724	6462	7438
680	1287	2069	2376	6395	6533	4206	6609	7754
681	1148	3135	4952	5879	950	4293	8487	6655
682	2514	617	3606	4239	4299	3682	5894	6538
683	1	2964	4055	3854	4878	5637	7205	7561
684	3487	4722	2995	3938	3255	5706	7693	7787
685	1	3948	1905	6585	4903	8456	6231	7235
686	1	2275	3167	3594	6197	4558	7769	6828
687	2026	12	5069	5118	3479	7479	7337	7236
688	4299	3446	4128	4384	6105	6972	6682	6762
689	1063	3749	3793	2413	3180	6479	5838	6711
690	3383	3826	7190	3739	3479	5964	4791	7515
691	1828	1309	2643	4594	5325	7036	5336	6418
692	2	6925	4132	4557	3714	5149	6183	6605
693	737	1157	42	2642	6542	7392	7234	7176
694	2648	2980	6614	4284	3949	6770	5236	6436
695	2732	324	5090	2540	5844	5441	7203	6438
696	2	975	3727	3444	7266	6789	6587	7793
697	208	219	2170	2635	4250	5913	5887	6680
698	4365	57	2490	4438	7508	8799	8390	7393
699	1891	1	3196	4121	278	6477	6360	6588
700	262	1944	4026	5322	4864	8224	7237	6585
701	2767	33	23	5987	5311	3958	8201	7696
702	669	3	3840	4142	5578	7103	7950	6679
703	1587	1781	4388	6692	5478	4066	6527	7313
704	371	1935	5956	6420	2933	6190	3870	5773
705	8	761	1760	3188	1872	5928	7281	7513
706	7	4317	6232	233	4677	3827	6731	6046
707	3027	2378	61	5287	5082	2735	7324	7095
708	2322	39	4520	6578	5562	3840	4123	5841
709	1963	6557	6	4980	7342	7727	6395	5472
710	102	5938	6651	5011	7436	7709	7092	6925
711	121	1496	5337	4331	2250	3741	6930	7994
712	5975	4818	7513	4697	3934	6945	7477	7655
713	2	43	4945	1890	5471	6643	4746	8392
714	2631	4227	3639	3795	5863	6385	6776	6357
715	2611	485	23	7032	6133	7363	7052	7933
716	4	3763	3857	4934	4427	5376	7084	4999
717	967	1655	3183	4863	4815	5302	6586	7679
718	2587	439	3149	1514	6363	6908	6807	5810
719	1844	5260	3102	4144	4562	7284	8280	7033
720	3139	347	3612	3961	7929	7688	6746	6353
721	784	11	3122	3506	2189	7589	3554	6305
722	3145	882	2288	2034	7719	5909	6899	8645
723	1074	4676	2185	4914	3961	5926	3923	4518
724	379	269	4842	5283	3953	4281	6714	7840
725	497	1	3185	2250	6376	3073	7533	6537
726	2	256	1781	5067	5662	3638	7331	7268
727	1768	3259	5071	3570	3294	7063	6406	8396
728	1	70	4608	3628	4617	4513	6548	7455
729	23	1089	2991	1955	6898	5644	8463	5669
730	2360	6331	2525	5505	3936	4257	6062	6324
731	42	5049	2054	6047	6708	5689	6639	5968
732	1462	806	3738	6208	3350	5892	7868	6120
733	2718	1	1121	4757	3455	5034	5828	7311
734	12	4	33	4260	5029	6775	4720	7387
735	821	544	4373	7348	6672	4792	4698	6537
736	987	4	7271	6481	5555	4857	5050	8373
737	2662	320	2785	4167	6903	5847	6432	6659
738	5120	1103	4071	6617	6624	6834	4099	6570
739	2401	18	2023	3447	5422	6041	5082	6983
740	1008	4134	1916	5823	5169	4992	6279	7634
741	1	5	5264	5607	5808	6367	5246	7237
742	1890	2024	4986	2872	5324	6734	5521	7749
743	5302	13	3657	5106	3156	6330	4168	7850
744	992	3355	3151	1971	6003	6795	6069	7852
745	1896	3059	2277	4107	2637	5207	6462	7493
746	2634	25	1796	730	2286	5236	7244	7050
747	2775	9	4393	4054	4018	6373	5819	6384
748	120	1969	3078	2715	5578	5857	5001	6503
749	377	1365	5236	4938	1301	4900	7330	7266
750	3974	19	0	5094	7354	5229	6896	6944
751	3274	354	1821	6746	6461	2802	5275	7750
752	376	3039	4820	4517	5890	6399	7019	7044
753	287	6343	1043	1081	1968	5657	5657	7286
754	988	3	4844	2887	2163	4565	6811	7789
755	583	1	1475	6682	2328	5192	7925	6281
756	3702	5288	4324	8	6222	6502	5743	7066
757	367	2035	4096	4990	5158	4394	7410	6976
758	43	240	2624	4218	5062	7165	5781	7607
759	2316	4386	2374	1781	5458	3139	5824	7047
760	815	2344	1550	6063	6066	6825	5988	6574
761	3446	3	4739	4837	5538	8530	5459	8137
762	216	2379	1822	2868	7040	7511	7553	6142
763	1779	2515	2711	4283	3610	5456	5182	7006
764	5660	2	4662	6565	3698	5690	7605	6351
765	2	6419	3385	6813	4029	3552	6005	5598
766	1739	5039	5	2245	5965	5062	5952	7675
767	3201	2	1316	2130	7881	5832	4764	7787
768	1057	2938	1018	4704	6735	5644	6129	7448
769	1027	73	1516	2970	5653	6467	7178	6357
770	5065	5305	5562	5628	5533	7081	6692	6402
771	408	4077	2924	2221	6017	5995	4367	6891
772	1659	996	5208	2099	4975	7278	6406	7889
773	314	21	6198	1264	892	4989	5998	7965
774	5823	6	2950	6649	2659	5302	5164	8436
775	2200	5466	5853	6381	6256	6961	4518	8267
776	640	728	2855	3581	4309	4518	5583	7476
777	93	580	1964	5529	7502	7370	7303	6707
778	3939	2669	1445	3348	3977	5419	5175	7290
779	195	2552	67	4237	3749	6925	4886	8241
780	2541	5	2914	3888	7330	4580	5651	5904
781	3747	1784	3065	8255	6000	6903	5332	8117
782	3937	904	3539	5412	5148	5013	5957	7696
783	5478	2841	3048	4455	7478	5215	4270	8492
784	3957	2652	149	3073	8116	3121	6239	7367
785	305	3022	4020	3762	2275	6367	6415	5916
786	383	54	3202	3849	4704	5150	8191	7234
787	95	1845	57	3936	4481	6851	6482	6453
788	62	7083	2996	4871	7918	5455	2929	8179
789	4626	1	5182	4152	5765	6712	6028	7580
790	32	4408	8	6696	2559	7090	6102	6260
791	0	1388	4646	721	5881	6529	5487	5856
792	599	4857	5618	3198	5721	6239	7442	7352
793	2560	1461	5693	3480	3401	6799	7374	7602
794	2211	3132	3013	5450	5344	6537	8008	6411
795	6502	587	4034	3461	3781	5262	6601	6720
796	2	3727	1543	2305	4867	4168	2929	7321
797	36	3759	5251	5930	7306	7174	7827	6409
798	1414	7	2689	5765	4550	4323	6642	7926
799	2047	1882	6006	3857	7466	2606	5870	6709
800	335	481	930	5411	5009	4404	6483	8070
801	2038	2	2747	4849	5959	7168	7474	6565
802	3	20	1650	1644	7439	7882	6788	6155
803	5682	2211	3431	5166	6019	2827	8167	8338
804	4268	2	2569	2264	7478	4539	7383	6674
805	3537	5436	8	6187	6397	5531	5925	8703
806	208	2912	1106	5741	7659	5502	6370	7732
807	953	8	60	869	2542	7012	6789	6525
808	795	3839	1692	5590	3961	6412	6085	5028
809	2043	4974	5	3080	4798	5611	6657	7045
810	2466	1784	896	105	2698	6327	6568	8305
811	2145	2870	4014	4209	4505	6692	6444	7509
812	1	4657	1022	2978	6584	6931	7754	7432
813	3078	599	5950	14	4070	7579	6369	7361
814	734	1903	5077	4933	5670	4850	7292	7641
815	2676	1958	2277	894	2274	5026	5784	7947
816	737	494	2923	1667	2840	4811	4811	8063
817	125	2	2947	627	5021	6837	5711	5678
818	20	3316	4135	5484	4336	6386	4443	7978
819	2014	976	0	2854	3991	6389	5245	7906
820	40	1819	6615	165	6082	7076	5439	6805
821	112	2666	3306	137	6257	4978	6135	8096
822	5	3905	4092	2581	7579	4992	6363	7189
823	3	6522	3326	2845	2710	2831	7104	7571
824	1	6608	5920	6291	5181	4949	8217	6962
825	12	32	5977	5578	7299	5396	6558	7035
826	4779	7119	6159	4245	4213	7692	6797	7378
827	692	3423	3	4423	4061	7576	5375	7583
828	1201	703	4310	1387	4373	5743	4157	7470
829	436	74	5911	3229	6103	4036	6638	7269
830	1	4240	2989	910	4863	5514	6479	7688
831	5357	2954	3479	2878	3921	8330	7679	7261
832	133	5258	5288	6794	5393	5944	6436	5843
833	105	706	6563	4943	1988	6720	5995	6025
834	1237	2137	5673	4011	3269	3759	6398	7864
835	61	3	909	5574	6506	6034	7237	7210
836	2	4372	3073	2720	6699	5139	4462	5944
837	3257	2234	3480	1064	7901	7697	7390	8570
838	197	1773	549	992	5322	5936	6424	6612
839	1033	3630	3088	38	3842	6840	6587	6896
840	5006	5860	4619	4142	4903	4178	2514	6059
841	3955	9	2915	5261	4121	4469	6901	7362
842	2912	3193	606	4152	5108	5620	5032	6707
843	3020	3739	678	1812	7079	6478	4889	4348
844	5	3463	4087	3284	5157	7709	7246	5747
845	38	1	4804	1613	5951	4426	7049	8223
846	1595	3496	2491	2730	5081	3986	4726	7996
847	2187	54	2846	6195	6030	6520	6689	5347
848	5014	3285	5648	4725	5397	5561	6103	6125
849	1737	4212	5512	3071	3023	6528	6184	7225
850	99	4936	1584	3181	3859	5620	6095	4941
851	2208	4394	960	2458	4337	7452	7094	5523
852	305	1363	4459	3879	7798	7938	6266	8143
853	1895	1755	4106	1035	6338	6624	6203	7322
854	174	585	6875	6496	6137	5941	4799	6739
855	1034	2446	2	1750	5517	6680	7681	6393
856	385	2032	5232	7399	4791	6045	4656	7766
857	920	0	2940	2263	5495	4070	5539	8021
858	1802	2971	2461	2429	5663	5406	7063	7108
859	2536	3236	2171	2279	7294	6873	7761	7621
860	17	1326	4826	4067	4991	7125	5675	6474
861	988	1	1937	5138	4069	8497	3262	7283
862	224	960	713	4087	4743	6201	6663	7296
863	3321	3075	1	1518	3341	4654	6647	5442
864	1098	2092	3472	697	2943	4615	5907	7846
865	1259	6673	4380	5991	5752	6720	4453	6315
866	265	3106	4422	4541	5212	5912	7641	6924
867	1	6960	31	5170	4509	5614	5262	6935
868	4612	492	3364	5852	7405	6354	5338	7772
869	3408	3608	2749	1535	3784	5799	4624	7411
870	4	2	5785	6806	6128	5085	5892	6574
871	29	3087	4046	3946	5859	6047	5640	7998
872	2988	3159	3122	3874	6394	6249	6910	6046
873	408	6532	5836	1631	4238	4250	6184	7805
874	700	28	1744	6386	4553	6560	3427	7704
875	333	4175	4691	5534	1833	6786	4755	8026
876	3311	2210	8562	2383	6599	4050	7233	7262
877	1	3490	5827	2362	1861	6462	7779	7689
878	1629	2874	6788	5604	3903	8104	6375	6336
879	71	1017	111	6799	5295	4692	6788	5449
880	30	4171	991	5703	3954	6811	5558	6397
881	2895	4279	1333	58	6515	4434	7645	5849
882	2613	240	3	5825	5464	5997	7044	5521
883	682	2273	4041	4568	6952	6495	7084	5716
884	1809	175	4199	5075	5040	5774	6690	7396
885	12	3697	4923	6315	6856	5567	6010	7987
886	3058	2	1862	4867	6300	6138	5168	6302
887	137	3298	6631	5509	6744	7969	7335	6896
888	65	4238	4958	3414	5201	4079	4993	7668
889	337	3380	1769	5212	5568	5957	7135	8010
890	4698	3991	5352	1206	5352	8585	7003	8141
891	534	4890	2458	955	1452	5017	7143	7926
892	3777	2142	1575	2032	3946	5355	5815	6279
893	1	1365	6773	3075	6211	7574	8333	7291
894	2	1	7924	3347	3397	5599	7617	6412
895	605	4520	7036	6184	5069	7739	5714	6779
896	749	5241	5922	2883	5669	7019	7416	4966
897	4047	2268	3450	4642	3981	4746	5801	6312
898	1	104	5643	3580	6471	5776	5605	6685
899	3152	2611	3	2223	4436	5320	6000	7528
900	3226	4169	6311	3	4267	5942	6821	7106
901	0	5025	2665	2952	567	6793	7296	6580
902	2372	2130	7085	1394	4680	5028	6400	7616
903	9	919	3550	5202	4236	6596	7488	7853
904	2077	1912	4090	24	4453	7000	6416	7834
905	1821	645	3633	6290	5827	5828	6259	6947
906	5074	2384	1604	3533	4712	3300	6025	8187
907	1	6373	271	3691	4259	3672	6867	7983
908	4023	6	2102	4797	4604	6993	7500	7540
909	5090	3080	1745	6848	4479	6473	6122	5039
910	4070	2525	2744	4763	1873	6431	5859	6850
911	3	1786	3574	2479	6433	3657	4356	7901
912	458	1825	5676	5049	4835	5775	6745	7748
913	150	1874	12	5456	6017	8441	6516	6058
914	52	799	2978	6743	6180	7309	5770	6793
915	3201	223	3899	7068	4352	7368	4257	7860
916	56	4684	970	2014	3368	4100	5830	6320
917	2	3026	1145	3346	6233	6188	6386	5970
918	4090	1622	2279	847	3578	6665	4877	6839
919	2132	191	3545	3658	5029	7258	7453	7241
920	40	6117	5155	6084	1629	2547	4897	6289
921	446	2421	1581	6157	7547	4447	5975	7170
922	5901	2939	5281	2790	2568	6208	6428	4767
923	480	235	2787	2508	2538	4766	5828	7918
924	2700	1	1753	2138	4043	7330	6799	6477
925	5266	2183	2917	5284	4366	6182	5655	7467
926	2289	2614	5311	5634	5872	4584	7255	7483
927	710	2378	6434	4897	6060	5498	4744	6760
928	1828	1928	3376	4836	5285	4972	5623	7796
929	23	8	5637	4805	5352	5224	6413	6070
930	50	20	3485	2300	5961	6410	6209	6705
931	2292	3439	4818	1531	3636	6402	5357	6782
932	50	567	4656	1568	2553	5939	5155	6969
933	1028	3522	2637	3612	2846	5134	4792	5947
934	1	3198	4771	5307	3460	3900	6690	6316
935	3141	5384	6201	6452	6122	4851	6172	7425
936	1244	2213	3267	4795	6046	6981	5434	6588
937	3592	279	2	7385	4033	6434	5553	6777
938	2754	1297	3407	6561	4215	4849	5651	8802
939	41	99	533	1898	7019	6068	4070	6855
940	801	3415	2095	2939	3006	5626	5029	7487
941	29	3601	5450	5755	4478	5737	6180	6155
942	4773	201	2087	6251	6899	6608	7011	6056
943	60	658	864	2844	4467	7569	3894	5991
944	1	7296	3515	7668	2658	5584	6496	7332
945	97	1173	3654	2401	5525	7803	4914	7039
946	1231	3579	4479	4496	1669	7992	6087	6912
947	2	2892	2999	5207	5439	5654	5233	7805
948	364	3668	1	5754	5627	3135	7244	7051
949	3474	1873	1150	5799	7189	7423	6112	6062
950	4280	1247	5442	4635	3268	1307	5666	7690
951	47	1858	25	2538	7769	7223	7017	6276
952	5	837	1197	4323	4637	5275	7032	7629
953	393	1602	4123	7898	2004	6797	4365	8622
954	3	1979	5198	6894	7059	8011	6276	8435
955	3385	3940	4766	2008	4684	7145	6979	7110
956	321	4630	5	5449	3758	6144	8349	6991
957	4780	3793	632	5801	6055	6209	6182	7556
958	124	1599	3242	5769	4659	5080	7069	6909
959	2144	2240	2616	2060	6753	4476	5368	7042
960	1	906	5570	1311	6279	7563	7369	6694
961	941	1364	5804	4776	5163	3545	5061	5250
962	335	5	5423	5948	2582	4049	5073	6370
963	1	1	7129	4725	1352	6114	5186	5522
964	1	1198	3	3060	5538	6804	5918	7527
965	3	4789	2749	4464	6088	5040	4867	6407
966	16	4311	192	4617	6253	5855	5366	6160
967	4	2932	5388	5638	5949	6072	5379	6481
968	1433	1	592	3372	5341	6296	7814	6307
969	7164	3700	1945	6925	6537	6047	6960	6409
970	2083	1122	744	4669	5239	4112	5399	7270
971	269	1760	2892	4	4097	5963	6467	8058
972	2285	4017	3194	429	5843	5371	6443	7850
973	2921	147	3114	5741	5797	5108	5748	7750
974	1415	7383	2598	3084	5205	3489	6435	5857
975	2185	1671	8	6807	4881	6652	6885	6577
976	1	346	681	4149	2985	7627	7750	7699
977	2	3124	7073	1875	3540	4362	6600	7016
978	3187	6645	522	2114	4014	6247	6324	5102
979	1012	5	919	2197	6438	8313	6263	6682
980	5	21	558	5749	5336	5301	6954	6530
981	10	3607	1016	4268	4668	6106	5567	6493
982	3232	1388	3118	6977	4250	5778	5454	7205
983	2637	14	4659	7988	5539	5805	4458	8201
984	97	724	3559	1915	1946	5694	5630	6227
985	1813	3810	6189	2928	3614	5193	3962	6972
986	5714	2369	1052	4101	7063	6789	4009	6781
987	3155	58	7409	5860	4813	4994	8350	6311
988	1515	106	2773	3992	5912	5775	5301	7828
989	8	4923	1608	6943	4977	5447	4915	7708
990	3419	861	5344	5273	5433	5483	5702	7476
991	3	1	3703	5661	4652	5811	6748	7640
992	4	1036	1644	2331	4649	3279	7570	5770
993	6	3085	3093	18	5105	8322	7032	6709
994	558	135	5747	2930	4894	5351	5660	6614
995	4	1	1807	2032	5304	5536	6842	8243
996	1021	1918	5164	3574	5006	6556	7794	6336
997	4720	923	657	3163	4825	7184	5745	8311
998	1719	3	4059	2879	5519	6337	4995	8014
999	530	2807	2752	6740	5238	6697	7505	6016
1000	491	5003	1186	4593	4471	5660	6091	7286

## Sheet: sequencing depth
Simulation No.	Subsampling ratio
	0.1	0.2	0.3	0.4	0.5	0.6	0.7	0.8	0.9
1	3724	5304	6221	6863	7143	7485	7734	7928	8058
2	3780	5384	6246	6802	7169	7453	7702	7895	8111
3	3645	5344	6208	6830	7202	7559	7663	7884	8095
4	3709	5359	6209	6835	7174	7485	7713	7890	8112
5	3724	5362	6338	6785	7260	7494	7705	7937	8067
6	3818	5400	6177	6784	7131	7449	7762	7869	8068
7	3788	5346	6230	6784	7200	7474	7687	7893	8101
8	3704	5324	6258	6810	7126	7479	7706	7892	8135
9	3718	5381	6229	6816	7185	7449	7638	7870	8055
10	3715	5408	6204	6751	7226	7503	7690	7889	8066
11	3712	5338	6226	6709	7179	7460	7695	7913	8067
12	3714	5351	6292	6780	7209	7428	7756	7937	8045
13	3748	5377	6221	6726	7174	7437	7725	7888	8057
14	3750	5388	6247	6757	7169	7537	7693	7894	8099
15	3746	5359	6206	6689	7126	7496	7758	7909	8102
16	3739	5352	6255	6793	7129	7503	7704	7888	8078
17	3725	5385	6257	6792	7181	7509	7745	7897	8099
18	3817	5401	6243	6838	7204	7502	7782	7937	8058
19	3681	5322	6255	6792	7158	7424	7672	7918	8054
20	3779	5359	6216	6789	7199	7471	7722	7959	8090
21	3743	5413	6266	6732	7176	7448	7684	7900	8087
22	3686	5350	6252	6811	7233	7525	7641	7938	8093
23	3728	5399	6200	6787	7157	7494	7742	7955	8054
24	3766	5335	6277	6740	7206	7474	7722	7929	8093
25	3655	5298	6226	6778	7168	7456	7729	7943	8036
26	3716	5390	6292	6769	7120	7441	7691	7891	8102
27	3737	5351	6139	6789	7102	7491	7745	7921	8068
28	3738	5310	6227	6756	7202	7528	7730	7928	8095
29	3760	5409	6245	6791	7116	7471	7768	7957	8127
30	3692	5363	6172	6829	7158	7459	7719	7927	8097
31	3765	5360	6153	6801	7164	7492	7719	7892	8111
32	3714	5348	6235	6728	7224	7405	7694	7940	8138
33	3716	5414	6255	6748	7150	7415	7732	7894	8073
34	3753	5314	6210	6854	7194	7499	7708	7924	8089
35	3733	5423	6216	6827	7160	7451	7695	7911	8050
36	3738	5228	6208	6763	7117	7471	7779	7905	8109
37	3697	5440	6292	6777	7165	7439	7715	7945	8062
38	3717	5331	6195	6852	7193	7419	7718	7940	8105
39	3725	5350	6233	6846	7087	7493	7726	7945	8075
40	3688	5392	6191	6758	7168	7454	7761	7916	8079
41	3787	5261	6154	6738	7144	7436	7718	7916	8075
42	3826	5434	6257	6808	7207	7515	7768	7902	8110
43	3746	5363	6267	6810	7179	7471	7704	7947	8071
44	3795	5295	6249	6746	7206	7464	7745	7888	8081
45	3819	5417	6186	6815	7126	7526	7730	7964	8038
46	3729	5414	6262	6784	7162	7458	7714	7935	8095
47	3738	5349	6260	6781	7136	7466	7748	7897	8087
48	3721	5343	6216	6756	7184	7496	7741	7870	8082
49	3823	5373	6257	6813	7207	7407	7725	7888	8091
50	3786	5344	6223	6770	7178	7532	7734	7914	8076
51	3680	5421	6229	6766	7179	7459	7706	7922	8095
52	3771	5513	6209	6783	7153	7459	7732	7925	8056
53	3723	5421	6259	6745	7149	7413	7691	7863	8112
54	3725	5409	6259	6777	7183	7462	7694	7941	8052
55	3751	5338	6273	6745	7189	7474	7724	7898	8066
56	3776	5341	6298	6725	7181	7438	7725	7935	8048
57	3683	5330	6235	6788	7194	7429	7701	7933	8056
58	3705	5413	6228	6779	7166	7449	7694	7877	8091
59	3710	5379	6157	6775	7138	7464	7669	7892	8063
60	3752	5374	6194	6780	7153	7494	7748	7897	8129
61	3707	5386	6237	6808	7248	7454	7727	7900	8117
62	3798	5390	6210	6798	7184	7491	7719	7931	8121
63	3767	5376	6242	6734	7164	7427	7657	7877	8076
64	3740	5373	6282	6828	7228	7490	7667	7919	8082
65	3733	5391	6242	6768	7187	7445	7758	7947	8087
66	3739	5440	6269	6753	7204	7503	7706	7901	8052
67	3707	5377	6229	6792	7183	7477	7741	7955	8072
68	3784	5368	6240	6752	7104	7501	7729	7934	8064
69	3732	5413	6262	6714	7120	7541	7655	7897	8090
70	3759	5371	6217	6714	7143	7427	7700	7868	8076
71	3750	5318	6207	6744	7151	7447	7705	7928	8112
72	3663	5314	6258	6771	7184	7535	7678	7960	8034
73	3733	5358	6243	6764	7155	7429	7686	7888	8095
74	3775	5432	6256	6806	7149	7472	7691	7899	8076
75	3783	5395	6235	6855	7186	7476	7659	7851	8093
76	3605	5375	6235	6813	7171	7456	7723	7884	8094
77	3714	5379	6205	6763	7216	7472	7729	7909	8051
78	3716	5369	6236	6846	7182	7470	7703	7904	8079
79	3772	5426	6202	6768	7135	7488	7680	7876	8070
80	3687	5292	6227	6794	7163	7429	7669	7933	8060
81	3797	5382	6215	6820	7177	7483	7757	7948	8075
82	3701	5376	6302	6659	7171	7475	7768	7962	8068
83	3736	5406	6245	6813	7248	7467	7734	7889	8121
84	3739	5406	6237	6763	7196	7411	7671	7922	8074
85	3716	5341	6204	6756	7122	7435	7766	7853	8117
86	3730	5436	6250	6760	7184	7488	7717	7876	8096
87	3725	5387	6222	6803	7138	7430	7608	7932	8092
88	3723	5343	6229	6788	7214	7481	7756	7908	8094
89	3716	5412	6246	6742	7177	7495	7644	7944	8088
90	3705	5433	6194	6766	7183	7496	7665	7971	8077
91	3772	5360	6212	6787	7200	7461	7680	7874	8083
92	3707	5347	6270	6786	7142	7474	7711	7937	8129
93	3699	5317	6236	6693	7213	7526	7719	7894	8126
94	3805	5382	6190	6769	7219	7488	7639	7889	8056
95	3733	5353	6157	6786	7179	7495	7734	7936	8088
96	3702	5309	6262	6695	7185	7467	7759	7899	8053
97	3706	5411	6232	6793	7127	7470	7719	7923	8038
98	3794	5303	6221	6742	7124	7472	7720	7911	8073
99	3717	5413	6230	6698	7186	7445	7695	7905	8100
100	3744	5370	6255	6785	7165	7483	7673	7926	8075
101	3735	5291	6232	6787	7198	7475	7711	7906	8060
102	3714	5330	6216	6735	7154	7506	7719	7898	8105
103	3801	5379	6160	6825	7170	7489	7740	7919	8042
104	3751	5460	6240	6791	7178	7513	7705	7898	8106
105	3770	5298	6244	6812	7219	7467	7729	7904	8070
106	3707	5329	6283	6758	7214	7471	7698	7893	8085
107	3748	5358	6295	6744	7251	7460	7709	7930	8106
108	3771	5267	6262	6855	7218	7465	7725	7929	8088
109	3830	5337	6193	6719	7199	7458	7732	7894	8069
110	3757	5366	6203	6772	7213	7445	7672	7918	8019
111	3693	5413	6188	6845	7153	7381	7675	7956	8079
112	3702	5341	6259	6787	7162	7401	7678	7958	8080
113	3696	5377	6261	6840	7177	7489	7746	7921	8081
114	3728	5354	6271	6784	7248	7518	7691	7925	8033
115	3756	5407	6314	6823	7149	7434	7677	7908	8075
116	3686	5400	6341	6785	7142	7480	7689	7937	8061
117	3734	5332	6230	6799	7169	7487	7713	7951	8077
118	3812	5410	6252	6780	7189	7474	7675	7878	8081
119	3810	5400	6207	6752	7148	7443	7695	7884	8021
120	3739	5376	6253	6863	7162	7518	7732	7933	8080
121	3681	5394	6190	6806	7163	7420	7765	7909	8115
122	3675	5375	6240	6812	7164	7482	7739	7834	8070
123	3739	5311	6233	6763	7198	7471	7753	7937	8117
124	3757	5334	6258	6788	7203	7480	7745	7947	8082
125	3744	5388	6226	6762	7157	7521	7699	7939	8040
126	3779	5314	6249	6762	7231	7445	7752	7894	8093
127	3681	5360	6266	6812	7257	7467	7727	7929	8057
128	3764	5387	6202	6767	7167	7473	7663	7953	8099
129	3724	5343	6200	6800	7137	7469	7718	7901	8115
130	3698	5393	6263	6784	7147	7455	7673	7904	8101
131	3756	5365	6256	6816	7165	7298	7719	7888	8083
132	3707	5323	6276	6753	7216	7462	7708	7915	8065
133	3782	5298	6283	6758	7159	7482	7694	7887	8005
134	3756	5335	6299	6795	7232	7443	7676	7916	8100
135	3799	5443	6256	6777	7200	7459	7760	7907	8091
136	3671	5347	6219	6836	7123	7451	7733	7914	8090
137	3702	5368	6245	6785	7123	7445	7725	7884	8053
138	3823	5420	6215	6798	7134	7457	7714	7933	8091
139	3691	5370	6237	6757	7192	7534	7685	7925	8103
140	3727	5430	6288	6813	7137	7502	7645	7930	8090
141	3672	5333	6263	6816	7108	7481	7657	7953	8101
142	3690	5436	6289	6772	7210	7464	7756	7859	8101
143	3828	5328	6258	6743	7188	7520	7772	7956	8009
144	3679	5384	6203	6758	7161	7445	7756	7893	8107
145	3713	5362	6306	6796	7213	7523	7711	7948	8059
146	3740	5395	6242	6813	7230	7509	7718	7889	8086
147	3743	5464	6233	6752	7176	7434	7674	7917	8081
148	3663	5222	6196	6747	7159	7474	7749	7880	8073
149	3767	5391	6261	6839	7180	7437	7738	7907	8063
150	3818	5257	6260	6797	7256	7482	7722	7888	8041
151	3765	5372	6231	6755	7164	7508	7762	7939	8068
152	3781	5347	6205	6791	7158	7514	7732	7935	8073
153	3700	5357	6282	6766	7140	7488	7718	7861	8074
154	3789	5434	6238	6740	7129	7462	7716	7870	8081
155	3789	5361	6259	6780	7134	7447	7727	7927	8094
156	3797	5331	6278	6719	7145	7484	7718	7895	8107
157	3795	5433	6263	6824	7159	7482	7726	7926	8037
158	3822	5412	6158	6786	7153	7488	7709	7919	8045
159	3743	5333	6182	6724	7168	7460	7751	7956	8081
160	3703	5327	6188	6776	7203	7514	7740	7975	8118
161	3675	5412	6319	6736	7191	7474	7741	7917	8110
162	3751	5309	6250	6854	7132	7510	7711	7892	8115
163	3736	5357	6245	6792	7219	7459	7732	7950	8043
164	3801	5431	6253	6817	7140	7463	7684	7883	8078
165	3742	5389	6226	6804	7227	7437	7749	7947	8057
166	3760	5395	6234	6765	7207	7470	7702	7927	8078
167	3762	5377	6218	6837	7194	7449	7731	7853	8058
168	3759	5381	6216	6791	7225	7494	7725	7903	8056
169	3798	5385	6186	6771	7130	7462	7722	7906	8094
170	3679	5340	6350	6748	7173	7501	7727	7931	8077
171	3721	5368	6264	6830	7250	7468	7681	7941	8079
172	3785	5381	6229	6724	7121	7466	7718	7890	8104
173	3742	5384	6166	6800	7171	7537	7701	7910	8079
174	3789	5414	6187	6832	7163	7439	7702	7850	8087
175	3706	5400	6215	6728	7155	7502	7690	7895	8043
176	3758	5380	6232	6722	7175	7491	7691	7919	8079
177	3732	5260	6222	6783	7199	7500	7714	7903	8037
178	3765	5360	6287	6800	7131	7496	7748	7906	8077
179	3673	5342	6181	6760	7131	7469	7713	7964	8054
180	3784	5398	6205	6782	7180	7423	7738	7913	8069
181	3756	5387	6236	6783	7117	7522	7747	7929	8064
182	3754	5345	6251	6819	7153	7470	7714	7889	8070
183	3745	5344	6305	6751	7180	7502	7739	7939	8088
184	3714	5351	6245	6777	7228	7482	7658	7892	8102
185	3766	5446	6217	6764	7172	7418	7709	7926	8079
186	3701	5357	6253	6718	7043	7467	7708	7954	8083
187	3767	5378	6273	6770	7210	7433	7702	7903	8061
188	3751	5393	6237	6789	7164	7549	7698	7954	8106
189	3811	5460	6246	6786	7135	7444	7751	7916	8104
190	3701	5437	6278	6804	7187	7537	7695	7916	8078
191	3773	5433	6249	6798	7136	7451	7781	7851	8048
192	3712	5451	6259	6856	7144	7453	7758	7869	8078
193	3800	5304	6267	6789	7119	7451	7753	7899	8046
194	3646	5400	6168	6761	7183	7495	7716	7893	8092
195	3648	5390	6246	6786	7160	7410	7756	7920	8077
196	3702	5365	6217	6795	7176	7434	7748	7930	8072
197	3762	5439	6233	6727	7234	7455	7695	7945	8108
198	3718	5436	6163	6791	7153	7539	7662	7935	8041
199	3695	5420	6224	6817	7165	7415	7728	7858	8096
200	3728	5390	6224	6814	7168	7448	7714	7932	8107
201	3759	5349	6206	6799	7173	7448	7674	7869	8088
202	3734	5457	6278	6711	7131	7462	7774	7913	8081
203	3764	5369	6235	6754	7127	7518	7746	7910	8068
204	3720	5428	6272	6762	7206	7484	7777	7927	8064
205	3702	5396	6212	6806	7175	7431	7714	7942	8055
206	3731	5448	6237	6815	7180	7508	7714	7877	8081
207	3819	5382	6196	6737	7156	7501	7672	7916	8026
208	3727	5288	6261	6769	7169	7437	7748	7877	8107
209	3886	5408	6304	6754	7160	7486	7663	7892	8103
210	3806	5521	6238	6769	7176	7389	7632	7879	8076
211	3766	5328	6225	6802	7182	7447	7753	7936	8055
212	3689	5401	6292	6726	7102	7523	7683	7972	8110
213	3749	5425	6233	6750	7231	7445	7699	7935	8072
214	3844	5422	6214	6783	7143	7480	7725	8003	8108
215	3708	5400	6219	6804	7183	7454	7726	7883	8100
216	3683	5395	6162	6803	7172	7480	7719	7890	8044
217	3734	5344	6267	6768	7179	7492	7685	7885	8086
218	3697	5472	6198	6845	7144	7500	7692	7891	8057
219	3810	5431	6305	6709	7154	7507	7721	7927	8099
220	3732	5419	6161	6769	7159	7510	7750	7967	8068
221	3685	5338	6236	6797	7170	7444	7714	7912	8075
222	3674	5342	6173	6883	7038	7493	7728	7920	8070
223	3782	5402	6249	6764	7132	7477	7663	7888	8134
224	3683	5369	6306	6774	7218	7492	7697	7875	8090
225	3727	5425	6134	6807	7171	7481	7733	7875	8055
226	3730	5364	6236	6808	7150	7446	7725	7922	8080
227	3729	5391	6209	6732	7206	7497	7704	7896	8092
228	3749	5472	6317	6776	7184	7474	7734	7904	8070
229	3762	5313	6222	6739	7121	7471	7712	7962	8113
230	3741	5341	6234	6795	7163	7443	7706	7936	8089
231	3754	5331	6212	6771	7129	7439	7692	7865	8077
232	3687	5437	6209	6752	7197	7474	7647	7932	8080
233	3723	5313	6161	6818	7168	7452	7732	7882	8074
234	3825	5349	6308	6838	7167	7514	7743	7902	8075
235	3731	5408	6202	6747	7168	7501	7739	7877	8134
236	3689	5401	6210	6828	7184	7506	7689	7906	8089
237	3807	5395	6207	6800	7200	7478	7743	7963	8072
238	3774	5362	6139	6692	7188	7449	7767	7893	8080
239	3786	5372	6322	6793	7150	7488	7731	7924	8041
240	3794	5430	6262	6755	7170	7484	7717	7885	8082
241	3752	5375	6209	6753	7159	7436	7783	7907	8030
242	3707	5344	6201	6800	7176	7417	7649	7888	8062
243	3809	5358	6257	6818	7200	7499	7704	7856	8084
244	3798	5394	6259	6812	7124	7459	7684	7941	8120
245	3743	5372	6223	6818	7199	7453	7746	7931	8108
246	3786	5354	6229	6815	7196	7444	7788	7906	8057
247	3722	5327	6246	6724	7167	7460	7706	7944	8106
248	3763	5396	6190	6727	7135	7451	7653	7888	8097
249	3774	5391	6160	6735	7205	7484	7735	7888	8005
250	3807	5358	6195	6807	7138	7479	7702	7937	8130
251	3756	5402	6206	6774	7178	7432	7679	7904	8068
252	3818	5414	6236	6765	7145	7436	7731	7935	8127
253	3687	5373	6245	6783	7185	7504	7723	7913	8083
254	3696	5396	6196	6847	7112	7500	7703	7880	8086
255	3721	5385	6226	6753	7185	7518	7729	7867	8083
256	3718	5381	6203	6781	7168	7437	7749	7888	8032
257	3766	5393	6216	6789	7148	7452	7785	7926	8063
258	3712	5309	6198	6772	7142	7492	7688	7934	8119
259	3759	5431	6219	6816	7230	7452	7675	7917	8093
260	3779	5355	6227	6742	7190	7519	7751	7882	8072
261	3715	5388	6191	6777	7229	7472	7728	7945	8077
262	3695	5396	6242	6863	7201	7506	7713	7902	8002
263	3761	5326	6258	6793	7187	7434	7686	7895	8074
264	3761	5348	6127	6733	7129	7417	7694	7906	8098
265	3678	5349	6243	6758	7157	7444	7739	7927	8077
266	3756	5365	6266	6831	7126	7444	7704	7920	8084
267	3754	5360	6295	6820	7137	7466	7760	7909	8076
268	3749	5390	6212	6853	7164	7483	7731	7961	8078
269	3679	5406	6262	6768	7173	7459	7697	7901	8061
270	3778	5443	6227	6800	7201	7502	7728	7850	8064
271	3697	5338	6232	6808	7175	7491	7715	7880	8035
272	3787	5456	6185	6810	7168	7483	7759	7931	8093
273	3777	5275	6206	6814	7157	7459	7681	7914	8061
274	3764	5396	6229	6790	7167	7515	7670	7953	8057
275	3706	5431	6148	6827	7168	7438	7739	7921	8080
276	3694	5407	6215	6726	7189	7467	7701	7967	8034
277	3719	5406	6297	6788	7164	7477	7750	7897	8063
278	3635	5371	6199	6785	7181	7505	7738	7946	8096
279	3669	5449	6207	6758	7137	7517	7746	7952	8074
280	3737	5325	6245	6780	7187	7556	7731	7873	8057
281	3751	5367	6237	6809	7253	7424	7750	7893	8082
282	3756	5391	6250	6805	7088	7466	7687	7940	8072
283	3844	5393	6229	6754	7146	7492	7681	7914	8079
284	3739	5321	6222	6790	7132	7462	7699	7933	8042
285	3796	5423	6230	6747	7165	7444	7678	7923	8065
286	3818	5367	6236	6708	7163	7435	7679	7966	8060
287	3709	5406	6223	6776	7164	7451	7781	7921	8095
288	3817	5417	6257	6841	7227	7482	7686	7939	8076
289	3685	5330	6255	6802	7195	7408	7721	7920	8072
290	3727	5380	6220	6775	7168	7505	7670	7911	8082
291	3762	5316	6220	6768	7147	7477	7697	7904	8073
292	3770	5407	6250	6747	7162	7453	7736	7879	8056
293	3742	5316	6241	6816	7164	7424	7691	7873	8044
294	3807	5457	6253	6743	7150	7469	7716	7952	8040
295	3760	5358	6226	6769	7247	7467	7669	7859	8135
296	3820	5336	6236	6732	7116	7515	7724	7928	8061
297	3783	5380	6264	6815	7191	7507	7737	7965	8082
298	3750	5422	6247	6864	7181	7454	7732	7897	8046
299	3635	5368	6162	6748	7221	7472	7715	7828	8045
300	3728	5258	6260	6761	7134	7418	7746	7932	8106
301	3711	5427	6233	6793	7134	7482	7790	7920	8084
302	3774	5346	6164	6711	7114	7519	7716	7873	8096
303	3731	5368	6239	6777	7228	7462	7740	7912	8056
304	3726	5368	6273	6734	7173	7478	7758	7873	8044
305	3752	5420	6194	6728	7185	7483	7713	7939	8071
306	3691	5366	6270	6729	7138	7495	7724	7933	8084
307	3827	5466	6273	6805	7139	7473	7715	7904	8090
308	3779	5369	6236	6774	7175	7501	7733	7937	8075
309	3810	5421	6239	6772	7166	7467	7736	7904	8113
310	3676	5401	6269	6873	7140	7499	7698	7898	8082
311	3765	5362	6196	6757	7117	7554	7667	7931	8079
312	3775	5392	6188	6784	7217	7439	7744	7859	8084
313	3768	5455	6153	6858	7128	7474	7707	7908	8059
314	3777	5378	6209	6728	7200	7449	7718	7961	8086
315	3757	5350	6220	6847	7141	7436	7763	7912	8106
316	3774	5365	6184	6772	7128	7497	7725	7940	8075
317	3828	5388	6241	6740	7157	7453	7698	7899	8084
318	3741	5352	6216	6759	7179	7423	7673	7920	8105
319	3724	5391	6238	6808	7171	7430	7716	7960	8089
320	3714	5321	6232	6820	7200	7500	7732	7919	8072
321	3734	5407	6226	6765	7218	7450	7643	7904	8068
322	3729	5372	6222	6805	7148	7483	7739	7883	8052
323	3804	5408	6205	6710	7114	7496	7747	7880	8099
324	3834	5417	6205	6773	7176	7505	7727	7897	8060
325	3673	5389	6279	6756	7195	7468	7728	7888	8056
326	3784	5362	6257	6751	7161	7513	7670	7863	8119
327	3753	5346	6182	6785	7205	7457	7749	7920	8067
328	3776	5345	6234	6844	7199	7413	7639	7918	8070
329	3726	5355	6230	6712	7256	7483	7715	7924	8034
330	3665	5391	6279	6784	7153	7514	7704	7910	8089
331	3813	5377	6228	6795	7201	7423	7676	7945	8105
332	3717	5340	6239	6794	7188	7459	7673	7865	8090
333	3712	5335	6241	6701	7213	7431	7722	7855	8092
334	3768	5433	6273	6688	7235	7486	7657	7840	8052
335	3746	5330	6308	6807	7143	7421	7679	7809	8104
336	3718	5433	6224	6799	7186	7493	7737	7930	8067
337	3680	5393	6209	6769	7183	7474	7708	7926	8072
338	3719	5402	6214	6806	7203	7465	7715	7911	8101
339	3761	5368	6275	6745	7174	7516	7752	7919	8063
340	3742	5327	6167	6810	7173	7437	7739	7940	8066
341	3726	5387	6259	6796	7130	7445	7704	7923	8042
342	3877	5347	6231	6838	7161	7406	7686	7905	8053
343	3809	5363	6269	6925	7181	7449	7698	7864	8072
344	3761	5335	6257	6774	7219	7546	7723	7919	8060
345	3727	5392	6299	6760	7140	7466	7703	7923	8078
346	3636	5414	6244	6835	7170	7586	7737	7910	8099
347	3804	5469	6250	6733	7200	7487	7659	7917	8094
348	3661	5406	6247	6735	7129	7501	7679	7885	8073
349	3782	5420	6222	6771	7166	7395	7782	7882	8002
350	3785	5370	6279	6764	7166	7516	7737	7976	8121
351	3789	5374	6291	6801	7203	7475	7781	7929	8069
352	3718	5387	6198	6735	7163	7419	7649	7871	8025
353	3727	5338	6241	6734	7133	7492	7712	7880	8116
354	3717	5349	6220	6786	7160	7505	7687	7903	8070
355	3784	5440	6350	6756	7202	7439	7726	7923	8086
356	3729	5335	6282	6844	7166	7472	7708	7923	8059
357	3811	5335	6237	6783	7123	7489	7646	7930	8076
358	3691	5455	6236	6770	7127	7428	7657	7906	8035
359	3762	5386	6212	6800	7118	7445	7740	7929	8068
360	3839	5335	6223	6786	7139	7486	7733	7883	8100
361	3721	5360	6167	6809	7140	7398	7701	7905	8093
362	3802	5427	6124	6796	7180	7475	7729	7908	8029
363	3783	5391	6229	6769	7182	7465	7640	7921	8083
364	3859	5356	6189	6749	7148	7430	7721	7933	8007
365	3761	5415	6258	6775	7130	7431	7675	7937	8080
366	3773	5331	6284	6800	7104	7502	7695	7890	8077
367	3752	5440	6248	6721	7146	7496	7709	7860	8073
368	3764	5380	6234	6806	7188	7455	7682	7924	8084
369	3661	5297	6267	6690	7111	7449	7712	7874	8088
370	3738	5364	6269	6792	7136	7452	7708	7939	8079
371	3752	5349	6265	6767	7161	7492	7735	7893	8086
372	3781	5400	6237	6784	7214	7493	7718	7879	8107
373	3759	5385	6234	6746	7198	7537	7759	7896	8084
374	3848	5368	6200	6753	7112	7419	7696	7893	8066
375	3706	5351	6305	6794	7180	7513	7657	7898	8098
376	3848	5369	6234	6753	7106	7517	7702	7914	8080
377	3730	5362	6263	6747	7212	7518	7696	7857	8067
378	3787	5451	6153	6829	7215	7424	7678	7888	8076
379	3777	5423	6257	6809	7218	7564	7709	7907	8097
380	3765	5407	6257	6761	7177	7385	7726	7915	8056
381	3826	5382	6186	6754	7180	7495	7726	7925	8084
382	3746	5426	6241	6792	7166	7506	7676	7866	8067
383	3776	5368	6216	6763	7190	7426	7718	7979	8084
384	3732	5368	6220	6765	7095	7482	7682	7952	8082
385	3752	5361	6244	6746	7197	7484	7653	7917	8113
386	3718	5387	6252	6803	7196	7456	7759	7923	8046
387	3683	5401	6207	6835	7155	7464	7708	7942	8034
388	3727	5340	6171	6733	7143	7462	7673	7877	8096
389	3666	5354	6237	6810	7162	7524	7717	7921	8102
390	3702	5391	6204	6843	7183	7472	7725	7917	8068
391	3817	5365	6271	6748	7097	7412	7683	7922	8126
392	3826	5371	6234	6738	7239	7467	7709	7936	8061
393	3767	5330	6225	6781	7192	7506	7691	7916	8124
394	3700	5431	6211	6799	7131	7473	7756	7909	8089
395	3733	5456	6246	6830	7175	7471	7724	7950	8083
396	3723	5359	6181	6751	7161	7470	7725	7869	8025
397	3797	5354	6207	6841	7133	7402	7728	7891	8066
398	3735	5458	6189	6787	7236	7515	7684	7891	8080
399	3711	5363	6240	6747	7163	7516	7679	7920	8079
400	3764	5359	6202	6793	7157	7450	7751	7854	8086
401	3761	5293	6239	6813	7095	7410	7714	7897	8059
402	3745	5351	6250	6717	7188	7412	7712	7979	8084
403	3671	5413	6243	6802	7138	7520	7724	7917	8058
404	3694	5401	6234	6772	7139	7416	7713	7907	8054
405	3687	5368	6263	6816	7126	7486	7688	7843	8087
406	3782	5379	6255	6836	7181	7501	7736	7918	8071
407	3612	5315	6252	6740	7159	7453	7748	7882	8089
408	3814	5406	6254	6797	7119	7447	7679	7927	8024
409	3717	5398	6152	6784	7129	7572	7735	7944	8044
410	3737	5347	6185	6769	7146	7474	7658	7887	8094
411	3771	5303	6174	6813	7154	7443	7685	7916	8048
412	3705	5356	6266	6759	7142	7480	7763	7953	8071
413	3753	5384	6221	6747	7190	7439	7687	7931	8094
414	3669	5409	6227	6732	7168	7456	7695	7982	8096
415	3762	5461	6237	6737	7175	7490	7689	7883	8075
416	3727	5368	6195	6734	7227	7478	7728	7917	8100
417	3729	5403	6211	6821	7165	7478	7658	7930	8069
418	3648	5345	6291	6804	7210	7430	7681	7921	8058
419	3715	5347	6215	6748	7218	7463	7735	7907	8047
420	3679	5294	6306	6765	7181	7429	7698	7938	8084
421	3725	5371	6268	6768	7179	7520	7750	7903	8069
422	3719	5417	6319	6730	7140	7442	7717	7897	8077
423	3738	5361	6235	6753	7208	7450	7713	7923	8037
424	3800	5399	6261	6778	7176	7452	7705	7982	8091
425	3798	5406	6270	6821	7136	7486	7766	7901	8067
426	3660	5433	6299	6841	7135	7510	7679	7856	8041
427	3704	5329	6212	6836	7146	7504	7702	7924	8022
428	3726	5385	6194	6787	7188	7430	7704	7931	8090
429	3756	5386	6212	6784	7181	7496	7710	7901	8065
430	3707	5435	6254	6822	7189	7531	7701	7913	8087
431	3784	5324	6267	6789	7170	7459	7681	7888	8041
432	3673	5398	6218	6778	7186	7442	7772	7938	8096
433	3766	5349	6228	6734	7185	7475	7729	7920	8090
434	3753	5410	6262	6761	7147	7479	7699	7890	8086
435	3759	5314	6261	6772	7196	7506	7674	7955	8052
436	3724	5409	6259	6775	7115	7452	7696	7882	8064
437	3797	5335	6286	6767	7184	7461	7719	7917	8093
438	3755	5421	6206	6789	7207	7488	7721	7910	8054
439	3730	5312	6219	6765	7135	7506	7711	7892	8059
440	3793	5310	6259	6789	7151	7522	7738	7861	8097
441	3722	5353	6189	6846	7207	7470	7745	7966	8036
442	3764	5337	6241	6817	7201	7452	7775	7954	8065
443	3818	5338	6203	6782	7147	7514	7702	7896	8075
444	3750	5344	6245	6753	7211	7534	7697	7924	8078
445	3723	5370	6270	6787	7185	7428	7732	7903	8048
446	3732	5445	6212	6798	7112	7554	7723	7914	8054
447	3727	5361	6180	6803	7133	7477	7750	7900	8044
448	3728	5346	6215	6785	7164	7457	7735	7891	8040
449	3710	5355	6292	6855	7206	7422	7707	7873	8104
450	3886	5316	6242	6760	7173	7479	7663	7877	8048
451	3671	5391	6194	6781	7193	7508	7681	7881	8086
452	3825	5408	6168	6717	7192	7434	7706	7901	8074
453	3787	5345	6169	6770	7155	7453	7726	7937	8085
454	3720	5335	6300	6752	7134	7414	7800	7970	8050
455	3702	5431	6250	6738	7185	7507	7705	7871	8080
456	3719	5298	6245	6729	7146	7471	7692	7896	8106
457	3712	5455	6278	6788	7202	7469	7745	7923	8096
458	3776	5311	6217	6785	7137	7445	7708	7926	8044
459	3738	5356	6247	6761	7136	7469	7685	7897	8090
460	3674	5360	6256	6748	7142	7441	7748	7893	8075
461	3765	5284	6194	6700	7131	7500	7718	7872	8049
462	3722	5354	6219	6748	7177	7450	7729	7917	8108
463	3731	5334	6192	6815	7131	7497	7687	7938	8049
464	3728	5353	6195	6799	7134	7469	7670	7916	8071
465	3837	5362	6265	6772	7135	7433	7754	7900	8100
466	3697	5442	6355	6808	7161	7484	7697	7896	8063
467	3730	5368	6191	6774	7180	7424	7728	7948	8070
468	3799	5347	6276	6758	7172	7453	7716	7904	8061
469	3732	5378	6298	6772	7180	7467	7654	7908	8079
470	3791	5416	6249	6768	7181	7522	7644	7918	8100
471	3767	5368	6261	6781	7122	7473	7709	7886	8096
472	3749	5354	6165	6805	7154	7509	7712	7876	8055
473	3712	5355	6170	6815	7143	7525	7731	7921	8122
474	3696	5356	6221	6785	7218	7462	7693	7920	8059
475	3713	5331	6212	6826	7155	7466	7726	7932	8055
476	3677	5380	6269	6753	7198	7424	7741	7896	8067
477	3706	5381	6220	6834	7194	7432	7745	7872	8085
478	3728	5424	6230	6774	7224	7491	7716	7924	8082
479	3719	5409	6256	6758	7130	7476	7700	7923	8100
480	3706	5379	6226	6788	7120	7532	7686	7908	8108
481	3803	5387	6233	6888	7169	7510	7759	7874	8054
482	3684	5417	6188	6786	7185	7548	7705	7914	8037
483	3757	5354	6244	6791	7202	7487	7731	7896	8062
484	3764	5252	6259	6818	7138	7459	7771	7893	8086
485	3703	5355	6182	6751	7098	7415	7749	7932	8049
486	3789	5321	6199	6821	7210	7498	7639	7926	8066
487	3762	5285	6331	6734	7238	7510	7752	7926	8087
488	3778	5349	6283	6760	7175	7491	7687	7924	8088
489	3753	5355	6202	6774	7184	7494	7710	7901	8049
490	3680	5375	6133	6757	7166	7434	7783	7953	8041
491	3841	5343	6273	6774	7112	7470	7683	7902	8056
492	3722	5261	6177	6746	7189	7444	7678	7910	8048
493	3741	5399	6225	6814	7285	7441	7741	7912	8081
494	3741	5402	6203	6803	7126	7522	7660	7856	8099
495	3696	5393	6301	6759	7179	7471	7687	7888	8077
496	3777	5474	6249	6814	7166	7460	7731	7879	8097
497	3728	5425	6296	6763	7237	7492	7722	7943	8112
498	3788	5392	6226	6827	7191	7412	7772	7916	8034
499	3798	5407	6218	6743	7215	7417	7713	7909	8096
500	3748	5341	6186	6775	7162	7484	7676	7895	8084
501	3762	5363	6217	6812	7182	7439	7685	7912	8098
502	3733	5382	6271	6770	7232	7481	7751	7971	8111
503	3722	5416	6199	6781	7171	7488	7687	7917	8062
504	3751	5360	6231	6783	7212	7497	7724	7912	8071
505	3759	5339	6205	6808	7128	7490	7687	7874	8089
506	3700	5448	6246	6864	7243	7510	7708	7889	8079
507	3809	5368	6157	6777	7264	7486	7696	7930	8108
508	3771	5405	6218	6836	7189	7461	7721	7917	8081
509	3779	5370	6168	6780	7200	7463	7713	7867	8040
510	3696	5402	6220	6763	7209	7474	7718	7945	8065
511	3776	5345	6193	6826	7138	7448	7735	7896	8118
512	3708	5403	6267	6684	7204	7546	7707	7869	8133
513	3726	5365	6287	6837	7181	7438	7686	7894	8066
514	3763	5386	6245	6839	7153	7547	7649	7892	8087
515	3675	5308	6249	6778	7217	7468	7694	7925	8057
516	3714	5445	6206	6770	7211	7421	7734	7925	8100
517	3770	5357	6222	6775	7142	7495	7730	7930	8063
518	3807	5441	6171	6753	7104	7531	7794	7875	8088
519	3762	5340	6246	6770	7222	7428	7722	7935	8100
520	3805	5309	6234	6796	7157	7473	7647	7937	8073
521	3818	5394	6260	6771	7183	7586	7763	7919	8065
522	3781	5312	6236	6750	7178	7460	7727	7901	8081
523	3762	5305	6164	6793	7115	7427	7695	7941	8063
524	3775	5361	6231	6758	7150	7491	7759	7871	8057
525	3800	5354	6232	6792	7152	7421	7712	7934	8034
526	3683	5383	6207	6688	7169	7439	7688	7894	8088
527	3753	5429	6193	6765	7185	7516	7723	7930	8125
528	3791	5290	6257	6814	7132	7530	7707	7949	8080
529	3696	5319	6285	6807	7216	7416	7709	7912	8085
530	3728	5341	6199	6829	7150	7499	7760	7924	8060
531	3659	5439	6241	6778	7206	7480	7720	7899	8085
532	3771	5338	6251	6782	7230	7456	7735	7876	8076
533	3809	5459	6262	6701	7177	7468	7701	7892	8070
534	3776	5424	6173	6766	7179	7505	7753	7881	8053
535	3731	5343	6222	6738	7226	7505	7758	7915	8128
536	3764	5344	6259	6806	7133	7399	7695	7880	8046
537	3800	5337	6192	6778	7173	7451	7730	7915	8090
538	3716	5336	6257	6815	7104	7485	7715	7904	8056
539	3822	5454	6257	6724	7150	7429	7716	7948	8095
540	3741	5406	6215	6762	7150	7492	7742	7930	8101
541	3826	5303	6191	6715	7186	7473	7748	7906	8073
542	3759	5401	6260	6838	7175	7463	7668	7927	8054
543	3756	5437	6165	6811	7165	7452	7760	7891	8097
544	3745	5362	6306	6784	7243	7494	7705	7916	8087
545	3826	5310	6226	6695	7170	7534	7659	7888	8061
546	3764	5417	6248	6748	7155	7419	7684	7903	8048
547	3754	5376	6224	6777	7188	7412	7729	7922	8054
548	3716	5408	6181	6719	7164	7508	7668	7865	8044
549	3692	5427	6251	6773	7204	7450	7750	7889	8080
550	3751	5392	6274	6795	7194	7445	7770	7919	8100
551	3718	5439	6191	6740	7192	7448	7626	7889	8045
552	3757	5361	6246	6796	7091	7502	7749	7887	8103
553	3793	5328	6261	6744	7229	7505	7773	7884	8063
554	3762	5334	6274	6851	7091	7523	7722	7922	8069
555	3787	5452	6247	6794	7202	7449	7731	7948	8036
556	3729	5381	6163	6691	7168	7467	7715	7857	8065
557	3653	5398	6191	6793	7203	7426	7695	7903	8057
558	3747	5366	6229	6747	7235	7457	7742	7913	8043
559	3677	5362	6214	6737	7277	7572	7689	7919	8054
560	3778	5325	6198	6723	7200	7510	7689	7913	8052
561	3780	5339	6237	6779	7204	7499	7688	7955	8053
562	3743	5337	6227	6797	7154	7497	7705	7963	8073
563	3831	5481	6234	6785	7217	7489	7667	7951	8017
564	3712	5347	6254	6726	7148	7484	7718	7902	8063
565	3768	5386	6222	6799	7160	7449	7678	7910	8057
566	3751	5414	6270	6829	7169	7471	7752	7990	8057
567	3788	5323	6204	6729	7205	7464	7744	7979	8053
568	3860	5378	6292	6781	7187	7455	7744	7881	8061
569	3765	5367	6219	6782	7199	7479	7697	7925	8101
570	3713	5372	6254	6779	7206	7452	7725	7900	8087
571	3704	5461	6208	6684	7235	7423	7707	7932	8072
572	3730	5410	6233	6773	7181	7508	7732	7915	8072
573	3799	5385	6216	6768	7134	7377	7675	7901	8059
574	3769	5407	6271	6791	7171	7436	7737	7918	8067
575	3686	5429	6240	6783	7193	7524	7716	7937	8096
576	3723	5417	6306	6765	7119	7447	7724	7912	8073
577	3790	5326	6137	6804	7212	7458	7717	7918	8069
578	3621	5332	6240	6748	7180	7499	7702	7848	8085
579	3743	5414	6172	6760	7250	7470	7670	7869	8060
580	3727	5343	6301	6823	7187	7447	7680	7918	8071
581	3787	5367	6230	6745	7179	7471	7699	7894	8068
582	3728	5336	6201	6790	7180	7571	7701	7931	8043
583	3679	5334	6226	6751	7219	7411	7720	7975	8105
584	3723	5382	6232	6776	7137	7516	7755	7901	8095
585	3773	5333	6246	6783	7151	7484	7711	7863	8039
586	3791	5388	6157	6796	7198	7457	7700	7941	8073
587	3671	5320	6221	6776	7120	7474	7724	7917	8066
588	3752	5389	6234	6781	7119	7486	7708	7882	8124
589	3740	5346	6271	6809	7081	7570	7739	7877	8054
590	3687	5340	6180	6710	7180	7448	7740	7924	8070
591	3703	5379	6245	6783	7161	7466	7689	7855	8043
592	3692	5410	6226	6745	7136	7424	7676	7894	8075
593	3687	5335	6211	6797	7207	7517	7697	7881	8057
594	3729	5434	6192	6794	7147	7473	7675	7905	8042
595	3670	5346	6259	6792	7143	7535	7727	7913	8026
596	3728	5429	6235	6784	7240	7464	7652	7882	8092
597	3761	5417	6233	6805	7183	7479	7785	7903	8065
598	3787	5393	6261	6788	7143	7410	7733	7909	8030
599	3728	5398	6301	6789	7181	7525	7754	7941	8054
600	3720	5456	6234	6788	7142	7498	7747	7949	8110
601	3758	5348	6198	6746	7149	7449	7713	7930	8093
602	3730	5411	6243	6701	7153	7471	7701	7925	8054
603	3756	5372	6270	6786	7190	7469	7690	7843	8073
604	3717	5386	6171	6713	7169	7516	7708	7885	8091
605	3694	5428	6270	6768	7114	7445	7726	7884	8058
606	3700	5361	6252	6762	7161	7496	7654	7854	8048
607	3781	5365	6294	6765	7230	7478	7665	7941	8119
608	3730	5309	6265	6711	7203	7488	7642	7915	8088
609	3748	5409	6205	6776	7144	7491	7755	7875	8102
610	3732	5379	6287	6801	7112	7460	7692	7962	8052
611	3709	5416	6207	6759	7172	7470	7722	7904	8091
612	3747	5410	6213	6715	7160	7475	7716	7908	8055
613	3791	5382	6222	6862	7199	7553	7745	7916	8081
614	3767	5363	6177	6782	7237	7450	7703	7877	8085
615	3753	5379	6311	6718	7142	7489	7699	7935	8048
616	3749	5353	6172	6751	7174	7459	7681	7918	8076
617	3783	5395	6267	6791	7157	7403	7715	7911	8082
618	3757	5460	6230	6772	7102	7478	7719	7907	8047
619	3719	5415	6243	6750	7191	7441	7708	7909	8033
620	3757	5365	6186	6792	7162	7495	7689	7886	8106
621	3841	5442	6233	6766	7158	7553	7716	7917	8096
622	3749	5343	6224	6775	7117	7464	7521	7904	8119
623	3764	5344	6183	6770	7206	7389	7753	7920	8090
624	3807	5402	6248	6767	7172	7471	7750	7952	8075
625	3684	5378	6225	6801	7139	7495	7718	7936	8093
626	3788	5350	6234	6768	7187	7450	7640	7899	8131
627	3811	5385	6248	6779	7161	7456	7718	7922	8061
628	3828	5353	6192	6757	7144	7474	7743	7945	8048
629	3747	5394	6169	6780	7136	7440	7682	7958	8096
630	3713	5351	6222	6757	7232	7449	7661	7873	8068
631	3739	5361	6230	6698	7112	7475	7711	7916	8119
632	3738	5386	6231	6777	7201	7449	7710	7966	8076
633	3724	5412	6169	6828	7161	7447	7731	7898	8084
634	3742	5422	6208	6710	7218	7497	7747	7918	8067
635	3810	5301	6249	6767	7230	7478	7704	7866	8081
636	3658	5409	6236	6761	7140	7437	7747	7889	8107
637	3761	5412	6261	6756	7185	7472	7745	7938	8094
638	3654	5322	6324	6764	7164	7438	7681	7923	8133
639	3743	5300	6265	6809	7153	7507	7674	7964	8097
640	3706	5402	6225	6746	7172	7453	7738	7906	8062
641	3735	5368	6202	6747	7129	7468	7735	7914	8108
642	3806	5404	6193	6831	7161	7480	7696	7898	8094
643	3705	5368	6194	6798	7188	7502	7729	7939	8051
644	3713	5365	6226	6778	7192	7493	7771	7947	8062
645	3655	5297	6267	6750	7174	7439	7685	7942	8028
646	3752	5394	6306	6796	7115	7437	7710	7915	8064
647	3829	5364	6180	6776	7157	7514	7711	7906	8011
648	3752	5380	6188	6807	7228	7479	7717	7897	8070
649	3744	5403	6240	6674	7170	7509	7680	7889	8085
650	3655	5348	6309	6770	7221	7466	7706	7909	8092
651	3833	5482	6212	6834	7140	7448	7757	7930	8089
652	3694	5353	6210	6759	7184	7463	7698	7887	8073
653	3683	5379	6266	6785	7218	7429	7704	7857	8101
654	3661	5322	6246	6780	7170	7468	7738	7915	8084
655	3787	5416	6236	6784	7229	7488	7776	7907	8061
656	3738	5411	6249	6767	7236	7442	7689	7919	8074
657	3740	5370	6232	6790	7200	7454	7788	7956	8078
658	3722	5372	6304	6846	7181	7495	7700	7896	8100
659	3749	5345	6185	6802	7117	7441	7724	7954	8073
660	3765	5338	6268	6812	7140	7471	7699	7885	8053
661	3818	5389	6245	6788	7215	7413	7758	7963	8080
662	3651	5346	6240	6785	7105	7470	7732	7898	8081
663	3781	5300	6227	6801	7147	7403	7738	7896	8107
664	3782	5391	6314	6779	7175	7468	7744	7882	8111
665	3694	5356	6203	6753	7100	7474	7697	7947	8065
666	3694	5315	6240	6828	7178	7443	7730	7936	8100
667	3714	5312	6265	6750	7121	7511	7655	7919	8046
668	3858	5372	6225	6785	7122	7456	7769	7897	8082
669	3763	5377	6224	6823	7113	7408	7754	7912	8066
670	3719	5389	6223	6815	7199	7519	7698	7931	8094
671	3719	5361	6147	6758	7217	7480	7696	7915	8109
672	3789	5434	6242	6761	7230	7465	7697	7887	8033
673	3790	5448	6243	6810	7130	7506	7680	7898	8061
674	3714	5409	6188	6767	7200	7471	7730	7875	8056
675	3728	5327	6218	6763	7162	7451	7730	7915	8094
676	3785	5403	6222	6801	7167	7478	7743	7890	8057
677	3779	5399	6273	6823	7127	7464	7729	7912	8060
678	3724	5375	6303	6775	7235	7478	7694	7855	8063
679	3756	5399	6295	6749	7220	7460	7699	7929	8083
680	3821	5405	6263	6723	7208	7424	7716	7876	8048
681	3773	5404	6262	6741	7187	7431	7671	7917	8092
682	3773	5383	6170	6803	7133	7506	7729	7897	8095
683	3770	5437	6223	6792	7094	7512	7738	7897	8051
684	3716	5443	6221	6806	7192	7479	7692	7965	8067
685	3767	5377	6305	6748	7149	7490	7749	7934	8085
686	3722	5354	6314	6794	7113	7452	7688	7935	8105
687	3751	5372	6173	6816	7117	7426	7717	7933	8132
688	3706	5385	6191	6806	7166	7430	7701	7851	8111
689	3804	5385	6191	6783	7205	7458	7652	7904	8057
690	3712	5395	6184	6755	7172	7439	7711	7887	8052
691	3769	5311	6211	6784	7147	7478	7719	7914	8054
692	3763	5337	6207	6725	7220	7495	7706	7931	8039
693	3823	5354	6198	6770	7180	7492	7756	7939	8069
694	3675	5306	6228	6751	7216	7427	7708	7925	8107
695	3749	5368	6181	6867	7173	7455	7735	7952	8078
696	3828	5412	6207	6800	7205	7409	7649	7908	8062
697	3699	5370	6240	6756	7202	7424	7672	7885	8038
698	3792	5392	6282	6747	7130	7489	7730	7911	8091
699	3762	5434	6167	6783	7120	7464	7716	7928	8050
700	3661	5397	6224	6793	7103	7519	7772	7931	8036
701	3648	5375	6206	6783	7206	7461	7737	7932	8109
702	3786	5351	6258	6744	7151	7499	7751	7935	8138
703	3737	5396	6214	6833	7176	7487	7702	7900	8076
704	3698	5305	6176	6752	7171	7424	7725	7920	8056
705	3724	5386	6279	6778	7221	7491	7708	7901	8142
706	3827	5353	6143	6784	7239	7474	7772	7925	8060
707	3654	5404	6202	6756	7228	7406	7725	7883	8071
708	3676	5373	6147	6819	7166	7469	7664	7931	8086
709	3725	5343	6241	6879	7142	7444	7711	7868	8113
710	3751	5322	6296	6750	7113	7395	7826	7934	8088
711	3704	5338	6251	6723	7150	7414	7736	7880	8122
712	3741	5363	6167	6715	7173	7447	7777	7922	8087
713	3693	5492	6304	6767	7250	7495	7701	7897	8092
714	3737	5372	6245	6806	7144	7473	7709	7873	8053
715	3782	5330	6253	6750	7088	7467	7691	7875	8079
716	3743	5348	6298	6799	7187	7506	7695	7888	8039
717	3733	5396	6209	6787	7161	7486	7769	7917	8118
718	3777	5409	6236	6788	7102	7492	7732	7881	8054
719	3834	5332	6273	6830	7153	7499	7756	7907	8077
720	3684	5360	6276	6725	7212	7486	7710	7914	8093
721	3741	5366	6189	6781	7186	7504	7738	7925	8141
722	3787	5322	6251	6747	7128	7429	7708	7928	8068
723	3808	5400	6258	6777	7143	7499	7746	7943	8045
724	3755	5346	6224	6722	7067	7492	7786	7846	8041
725	3733	5367	6189	6794	7145	7480	7718	7905	8060
726	3695	5344	6257	6760	7229	7510	7695	7940	8056
727	3740	5367	6212	6745	7138	7402	7754	7877	8063
728	3768	5412	6170	6800	7168	7486	7722	7928	8104
729	3620	5407	6272	6791	7152	7487	7689	7950	8063
730	3670	5417	6207	6775	7236	7509	7741	7871	8075
731	3747	5312	6253	6811	7170	7479	7730	7938	8083
732	3745	5390	6229	6731	7147	7488	7709	7923	8032
733	3756	5367	6265	6797	7152	7509	7717	7920	8101
734	3727	5420	6230	6840	7156	7444	7735	7955	8041
735	3747	5367	6197	6805	7178	7473	7717	7903	8067
736	3743	5406	6275	6814	7259	7432	7693	7884	8079
737	3830	5346	6216	6724	7216	7449	7745	7931	8091
738	3707	5421	6236	6726	7147	7503	7719	7902	8089
739	3778	5423	6146	6745	7192	7495	7686	7968	8088
740	3796	5370	6176	6772	7177	7535	7725	7876	8048
741	3798	5395	6235	6695	7109	7452	7678	7922	8071
742	3769	5406	6230	6814	7161	7467	7714	7936	8085
743	3701	5320	6294	6862	7183	7478	7777	7942	8061
744	3725	5336	6267	6776	7175	7466	7741	7959	8088
745	3689	5345	6230	6798	7245	7480	7755	7897	8066
746	3711	5397	6223	6803	7159	7491	7679	7938	8130
747	3651	5352	6233	6800	7186	7485	7714	7928	8090
748	3800	5342	6178	6765	7170	7520	7728	7877	8075
749	3803	5346	6177	6727	7135	7498	7704	7949	8083
750	3768	5317	6263	6744	7208	7430	7683	7902	8111
751	3734	5370	6270	6817	7192	7480	7733	7910	8054
752	3667	5405	6263	6750	7201	7511	7723	7912	8052
753	3751	5408	6190	6840	7141	7472	7689	7856	8087
754	3861	5294	6283	6787	7270	7466	7766	7965	8080
755	3727	5305	6137	6798	7244	7491	7722	7913	8082
756	3799	5483	6353	6772	7169	7457	7698	7921	8079
757	3852	5397	6246	6750	7152	7534	7721	7955	8111
758	3667	5290	6258	6735	7122	7455	7703	7901	8107
759	3783	5344	6254	6711	7156	7392	7704	7904	8075
760	3689	5367	6189	6769	7199	7479	7717	7923	8063
761	3781	5375	6216	6777	7185	7424	7757	7889	8066
762	3726	5353	6255	6864	7150	7465	7725	7934	8076
763	3866	5362	6159	6772	7169	7486	7721	7890	8076
764	3859	5366	6177	6797	7150	7527	7785	7891	8062
765	3668	5401	6305	6775	7222	7454	7678	7928	8058
766	3692	5378	6251	6751	7125	7494	7721	7911	8048
767	3718	5443	6150	6710	7198	7529	7709	7923	8070
768	3773	5327	6219	6771	7201	7448	7668	7907	8117
769	3806	5368	6195	6777	7149	7426	7685	7868	8045
770	3822	5433	6234	6758	7104	7573	7734	7968	8029
771	3728	5397	6199	6780	7158	7454	7756	7925	8086
772	3828	5449	6230	6766	7137	7432	7685	7883	8104
773	3697	5290	6252	6792	7228	7527	7721	7908	8057
774	3747	5324	6236	6717	7182	7465	7695	7930	8071
775	3717	5404	6239	6777	7250	7477	7737	7969	8070
776	3846	5349	6221	6840	7189	7513	7682	7860	8036
777	3822	5405	6200	6822	7174	7503	7736	7917	8126
778	3745	5358	6245	6803	7211	7531	7681	7864	8096
779	3813	5400	6248	6770	7165	7463	7714	7901	8099
780	3762	5362	6256	6723	7160	7558	7674	7970	8086
781	3714	5483	6290	6786	7182	7432	7733	7890	8047
782	3726	5342	6257	6816	7209	7514	7756	7917	8071
783	3789	5310	6234	6818	7136	7497	7774	7967	8062
784	3715	5361	6255	6744	7180	7446	7726	7946	8118
785	3675	5367	6210	6791	7173	7463	7775	7911	8095
786	3753	5366	6260	6807	7220	7455	7699	7910	8047
787	3730	5277	6267	6812	7095	7391	7721	7903	8091
788	3809	5399	6228	6792	7236	7500	7723	7900	8088
789	3709	5357	6233	6761	7156	7450	7647	7897	8091
790	3679	5322	6194	6732	7197	7495	7698	7943	8060
791	3803	5490	6218	6818	7145	7485	7690	7902	8084
792	3637	5377	6229	6809	7182	7524	7752	7948	8063
793	3757	5389	6293	6781	7153	7425	7693	7900	8086
794	3738	5296	6279	6734	7120	7414	7787	7927	8125
795	3726	5350	6327	6773	7166	7440	7691	7920	8102
796	3706	5395	6297	6781	7214	7471	7694	7916	8091
797	3707	5386	6259	6799	7154	7534	7684	7848	8047
798	3770	5305	6230	6779	7166	7419	7727	7971	8039
799	3823	5409	6200	6771	7209	7464	7783	7940	8075
800	3790	5345	6254	6858	7235	7371	7743	7913	8087
801	3779	5404	6148	6746	7187	7467	7703	7889	8101
802	3733	5442	6283	6800	7176	7451	7702	7917	8093
803	3761	5447	6203	6729	7221	7377	7732	7874	8073
804	3726	5371	6243	6818	7212	7454	7757	7922	8105
805	3725	5449	6237	6839	7226	7528	7720	7943	8057
806	3682	5402	6186	6730	7154	7479	7728	7883	8084
807	3757	5389	6242	6793	7171	7470	7706	7902	8052
808	3709	5359	6309	6780	7138	7501	7694	7922	8051
809	3691	5381	6194	6777	7179	7466	7690	7941	8103
810	3770	5444	6244	6838	7141	7470	7703	7906	8100
811	3781	5442	6188	6746	7188	7469	7763	7963	8095
812	3773	5390	6277	6751	7171	7515	7674	7874	8077
813	3678	5392	6179	6745	7160	7447	7737	7947	8088
814	3755	5351	6275	6705	7192	7488	7761	7925	8046
815	3753	5391	6234	6670	7236	7471	7718	7879	8075
816	3754	5327	6240	6817	7181	7441	7770	7861	8049
817	3736	5420	6230	6809	7191	7441	7699	7878	8082
818	3708	5322	6234	6828	7109	7482	7738	7913	8048
819	3706	5408	6255	6777	7210	7482	7683	7898	8082
820	3839	5377	6216	6794	7221	7451	7800	7915	8082
821	3754	5286	6268	6704	7150	7445	7696	7932	8120
822	3646	5375	6230	6829	7204	7427	7698	7832	8091
823	3718	5405	6247	6822	7181	7433	7718	7960	8107
824	3737	5378	6283	6786	7127	7433	7778	7915	8106
825	3747	5397	6156	6714	7246	7513	7704	7923	8094
826	3679	5367	6252	6803	7129	7490	7747	7965	8102
827	3696	5341	6278	6771	7139	7494	7744	7890	8088
828	3825	5403	6243	6768	7183	7475	7719	7901	8098
829	3670	5425	6246	6775	7170	7472	7701	7932	8119
830	3745	5381	6258	6811	7195	7476	7708	7902	8041
831	3871	5386	6152	6745	7213	7475	7740	7893	8047
832	3760	5407	6285	6750	7160	7457	7664	7909	8076
833	3678	5439	6270	6801	7200	7504	7701	7905	8088
834	3747	5363	6233	6714	7170	7498	7728	7883	8128
835	3785	5408	6220	6834	7203	7405	7755	7909	8092
836	3731	5430	6263	6795	7175	7461	7691	7945	8054
837	3731	5449	6262	6799	7221	7434	7693	7934	8029
838	3757	5342	6234	6816	7212	7402	7698	7896	8090
839	3685	5397	6314	6834	7121	7415	7689	7977	8085
840	3834	5288	6232	6787	7188	7444	7680	7824	8071
841	3733	5369	6208	6786	7167	7491	7663	7899	8065
842	3812	5433	6244	6839	7194	7497	7660	7936	8082
843	3765	5391	6261	6804	7146	7430	7726	7868	8104
844	3710	5340	6283	6750	7138	7458	7653	7935	8063
845	3721	5340	6189	6711	7193	7460	7719	7871	8108
846	3809	5389	6278	6756	7179	7423	7681	7934	8076
847	3789	5380	6225	6736	7172	7549	7710	7965	8057
848	3765	5364	6212	6751	7168	7461	7708	7896	8082
849	3753	5352	6227	6797	7208	7448	7672	7950	8093
850	3807	5348	6205	6777	7185	7460	7699	7933	8071
851	3748	5385	6209	6798	7220	7462	7696	7870	8071
852	3725	5292	6249	6761	7174	7477	7730	7899	8100
853	3785	5379	6262	6804	7166	7509	7742	7918	8078
854	3848	5359	6233	6773	7168	7441	7736	7960	8050
855	3791	5360	6192	6724	7192	7456	7725	7904	8083
856	3688	5348	6223	6818	7236	7500	7734	7916	8063
857	3794	5347	6230	6785	7165	7518	7617	7834	8080
858	3779	5305	6217	6696	7159	7492	7708	7901	8126
859	3815	5378	6270	6720	7223	7492	7702	7873	8112
860	3711	5411	6213	6768	7181	7528	7688	7875	8045
861	3707	5347	6220	6819	7165	7433	7687	7933	8096
862	3648	5359	6188	6850	7156	7422	7691	7900	8092
863	3715	5351	6242	6758	7160	7501	7751	7934	8015
864	3707	5313	6201	6827	7212	7436	7765	7872	8075
865	3663	5483	6284	6840	7166	7482	7698	7934	8091
866	3668	5374	6242	6788	7194	7385	7702	7926	8068
867	3735	5449	6181	6876	7191	7486	7742	7906	8065
868	3763	5360	6205	6809	7270	7414	7741	7959	8058
869	3751	5371	6228	6833	7120	7476	7756	7897	8100
870	3769	5401	6235	6819	7169	7539	7785	7896	8106
871	3787	5361	6209	6777	7200	7501	7684	7951	8048
872	3695	5408	6321	6771	7161	7558	7681	7857	8082
873	3811	5334	6151	6839	7165	7419	7686	7869	8121
874	3809	5392	6283	6774	7241	7414	7715	7926	8054
875	3762	5312	6270	6780	7137	7461	7690	7882	8086
876	3743	5392	6265	6809	7150	7461	7729	7955	8082
877	3783	5326	6227	6769	7153	7486	7684	7906	8089
878	3710	5315	6157	6730	7179	7507	7776	7856	8049
879	3786	5332	6207	6782	7207	7481	7665	7900	8089
880	3741	5414	6224	6805	7154	7453	7746	7908	8059
881	3737	5398	6227	6889	7185	7517	7700	7951	8055
882	3741	5402	6193	6758	7166	7497	7656	7951	8053
883	3769	5373	6250	6785	7257	7474	7703	7967	8059
884	3747	5402	6198	6756	7144	7452	7740	7926	8022
885	3731	5337	6264	6744	7172	7469	7735	7931	8068
886	3717	5375	6258	6783	7089	7418	7710	7901	8070
887	3705	5348	6211	6785	7144	7497	7731	7955	8085
888	3775	5400	6283	6711	7200	7399	7687	7915	8064
889	3776	5349	6217	6814	7186	7422	7742	7945	8064
890	3666	5282	6277	6689	7147	7546	7715	7875	8079
891	3658	5348	6238	6764	7162	7438	7740	7914	8114
892	3753	5387	6228	6762	7189	7386	7693	7884	8110
893	3809	5353	6230	6736	7160	7477	7717	7897	8077
894	3760	5251	6209	6729	7180	7454	7739	7925	8052
895	3795	5394	6222	6794	7100	7403	7681	7919	8044
896	3709	5336	6213	6702	7092	7416	7732	7882	8019
897	3757	5362	6303	6724	7211	7490	7713	7897	8071
898	3711	5399	6199	6799	7154	7446	7649	7893	8075
899	3760	5386	6227	6829	7179	7504	7708	7910	8076
900	3755	5382	6265	6820	7177	7428	7750	7891	8085
901	3733	5361	6261	6797	7170	7479	7698	7885	8060
902	3770	5418	6232	6797	7245	7461	7729	7902	8045
903	3691	5384	6203	6805	7097	7498	7733	7932	8084
904	3739	5368	6272	6781	7213	7483	7678	7902	8097
905	3777	5319	6288	6767	7143	7430	7654	7948	8061
906	3699	5427	6261	6825	7155	7458	7752	7858	8045
907	3639	5413	6193	6772	7194	7449	7664	7904	8075
908	3755	5381	6210	6764	7156	7396	7641	7954	8095
909	3721	5354	6253	6771	7156	7492	7734	7922	8061
910	3725	5373	6242	6794	7164	7464	7670	7954	8104
911	3743	5402	6224	6724	7142	7459	7685	7963	8039
912	3683	5411	6262	6682	7113	7488	7725	7892	8072
913	3715	5400	6248	6775	7095	7430	7687	7940	8097
914	3812	5308	6233	6850	7133	7458	7689	7889	8045
915	3702	5427	6200	6759	7105	7463	7754	7904	8069
916	3793	5360	6317	6835	7142	7452	7656	7953	8112
917	3791	5336	6270	6731	7169	7512	7691	7898	8078
918	3742	5391	6205	6763	7235	7468	7756	7896	8063
919	3707	5389	6208	6762	7066	7496	7747	7956	8049
920	3734	5348	6241	6781	7164	7457	7676	7922	8061
921	3790	5413	6204	6793	7122	7467	7766	7922	8025
922	3812	5325	6245	6746	7156	7424	7677	7898	8090
923	3757	5341	6244	6746	7236	7436	7675	7944	8046
924	3718	5384	6196	6800	7178	7515	7740	7893	8040
925	3702	5414	6218	6749	7175	7437	7710	7861	8040
926	3715	5367	6213	6720	7163	7502	7695	7920	8074
927	3790	5380	6244	6839	7185	7394	7735	7951	8077
928	3736	5342	6179	6753	7168	7437	7738	7902	8087
929	3790	5437	6230	6743	7143	7435	7720	7944	8063
930	3765	5411	6202	6804	7125	7530	7734	7951	8107
931	3757	5287	6347	6784	7274	7584	7737	7946	8094
932	3861	5439	6230	6719	7220	7475	7726	7956	8059
933	3747	5381	6226	6784	7167	7417	7708	7891	8111
934	3771	5399	6137	6796	7091	7427	7721	7928	8100
935	3737	5448	6292	6808	7086	7531	7714	7891	8011
936	3806	5365	6239	6789	7182	7469	7721	7896	8122
937	3769	5453	6293	6790	7170	7522	7723	7963	8125
938	3724	5335	6137	6697	7111	7450	7674	7964	8070
939	3761	5378	6308	6800	7191	7513	7732	7880	8078
940	3640	5368	6275	6741	7140	7453	7670	7934	8134
941	3786	5340	6246	6824	7206	7454	7677	7898	8049
942	3690	5412	6243	6753	7181	7532	7668	7906	8065
943	3736	5428	6259	6754	7165	7440	7796	7947	8056
944	3784	5390	6195	6780	7214	7472	7773	7949	8039
945	3684	5336	6271	6809	7179	7481	7687	7850	8061
946	3740	5460	6290	6804	7156	7458	7651	7947	8046
947	3757	5359	6229	6826	7148	7491	7700	7841	8042
948	3785	5311	6328	6804	7124	7451	7698	7921	8096
949	3721	5461	6278	6734	7202	7422	7711	7893	8046
950	3719	5339	6230	6765	7152	7496	7738	7904	8052
951	3674	5437	6158	6814	7162	7432	7667	7928	8070
952	3799	5417	6208	6806	7167	7485	7708	7882	8072
953	3824	5345	6201	6786	7174	7447	7667	7889	8077
954	3840	5464	6219	6792	7224	7498	7771	7921	8044
955	3703	5455	6164	6792	7139	7410	7700	7925	8094
956	3837	5327	6273	6726	7167	7461	7739	7929	8050
957	3690	5349	6298	6772	7199	7464	7671	7908	8051
958	3820	5371	6214	6756	7087	7462	7747	7907	8049
959	3751	5339	6203	6762	7151	7451	7727	7921	8052
960	3790	5375	6256	6796	7161	7420	7727	7955	8088
961	3772	5393	6234	6717	7162	7454	7688	7917	8060
962	3771	5427	6257	6800	7210	7444	7696	7890	8043
963	3762	5408	6279	6728	7219	7504	7714	7868	8109
964	3778	5464	6244	6724	7154	7475	7721	7924	8053
965	3732	5363	6220	6865	7093	7468	7669	7916	8067
966	3701	5293	6193	6789	7182	7467	7653	7949	8053
967	3760	5325	6211	6805	7214	7453	7763	7910	8040
968	3700	5437	6297	6812	7174	7410	7709	7950	8088
969	3687	5397	6200	6780	7200	7400	7764	7960	8059
970	3777	5312	6308	6783	7101	7487	7732	7857	8067
971	3790	5434	6323	6784	7200	7500	7731	7869	8069
972	3751	5319	6187	6780	7228	7461	7748	7918	8094
973	3617	5365	6188	6816	7179	7467	7704	7911	8063
974	3788	5426	6247	6741	7192	7467	7673	7853	8089
975	3738	5256	6272	6800	7105	7551	7724	7932	8086
976	3733	5298	6237	6787	7099	7502	7717	7888	8077
977	3782	5377	6234	6785	7204	7442	7753	7879	8069
978	3697	5354	6306	6832	7193	7443	7758	7984	8113
979	3729	5347	6220	6743	7229	7502	7704	7895	8117
980	3771	5357	6230	6774	7138	7477	7700	7890	8039
981	3693	5379	6214	6822	7242	7491	7677	7913	8128
982	3739	5305	6349	6781	7144	7411	7681	7941	8095
983	3738	5366	6249	6766	7145	7528	7693	7902	8056
984	3731	5451	6219	6743	7211	7532	7706	7900	8093
985	3877	5375	6201	6812	7208	7502	7658	7903	8092
986	3798	5324	6197	6754	7142	7468	7707	7891	8045
987	3741	5416	6247	6798	7128	7512	7655	7954	8078
988	3715	5364	6235	6764	7185	7462	7672	7878	8044
989	3743	5351	6250	6798	7130	7486	7704	7902	8092
990	3767	5488	6226	6712	7210	7485	7731	7915	8073
991	3639	5405	6182	6791	7179	7499	7701	7865	8121
992	3720	5444	6211	6792	7174	7464	7674	7856	8027
993	3739	5382	6295	6754	7175	7438	7699	7926	8097
994	3751	5380	6236	6757	7284	7490	7700	7881	8093
995	3749	5422	6185	6760	7236	7486	7703	7954	8054
996	3695	5421	6234	6782	7160	7457	7762	7909	8074
997	3746	5337	6224	6732	7090	7499	7705	7898	8083
998	3746	5298	6250	6764	7213	7458	7650	7908	8081
999	3682	5336	6229	6703	7190	7438	7730	7913	8040
1000	3749	5359	6239	6782	7170	7534	7741	7938	8127
